1     **Targeting of mitochondrial and cytosolic substrates of tRNA isopentenyltransferases:**  
2                     **selection of differential tRNA-i6A37 identity subsets**

3  
4             Abdul Khalique, Sandy Mattijssen, Alexander F. Haddad<sup>#</sup>, and Richard J. Maraia<sup>1,\*</sup>

5  
6     Intramural Research Program of the *Eunice Kennedy Shriver* National Institute of Child Health and  
7             Human Development, National Institutes of Health, Bethesda, MD, USA,

8                     <sup>1</sup>Commissioned Corps, U.S. Public Health Service

9  
10    <sup>#</sup>Present address: School of Medicine, University of California, San Francisco, CA, USA

11  
12    Abbreviations: AC: anticodon, ACL: anticodon loop, ASL: anticodon stem loop, IPTase:  
13    isopentenyltransferase, MTS: mitochondrial targeting sequence, TMS: tRNA-mediated  
14    suppression, TRIT1: tRNA isopentenyltransferase-1

15  
16    <sup>\*</sup>To whom correspondence should be directed at: maraiar@mail.nih.gov

17  
18  
19    **Short title: Conserved IPTases select different subsets of tRNAs for i6A37 modification**

20  
21  
22    Items are in the following order: Title page, Abstract, Author Summary, Introduction, Results,  
23    Discussion, Materials and Methods, Acknowledgments, References, Figure legends, Tables.

24

25 **ABSTRACT**

26 tRNA isopentenyltransferases (IPTases), which add an isopentenyl group to  $N^6$  of adenosine-37  
27 (i6A37) of certain tRNAs, are among a minority of modification enzymes that act on both cytosolic  
28 and mitochondrial substrates. The *Caenorhabditis elegans* mitochondrial IPTase impacts life  
29 expectancy, and pathogenic mutations to human IPTase (TRIT1) that decrease i6A37 levels cause  
30 mitochondrial insufficiency and neurodevelopmental disease. Understanding of IPTase broad  
31 function should consider the differential identities of the tRNAs selected for i6A37 formation and  
32 their cognate codons, which vary among species in both their nuclear- and mitochondria-encoded  
33 tRNAs. Substrate selection is principally by recognition of the A36-A37-A38 sequence but can be  
34 negatively impacted by certain anticodons, and by ill-defined properties of the IPTase. Thus, tRNAs-  
35 i6A37 comprise a modification code system whose principles are incompletely understood. While  
36 *Saccharomyces cerevisiae* uses alternative translation initiation to target IPTase to mitochondria, our  
37 analyses indicate that TRIT1 uses a single initiation site to produce a mitochondrial targeting  
38 sequence (MTS) that we demonstrate by point mutagenesis using GFP imaging in human cells. We  
39 also examined cytosolic and mitochondrial tRNA modification by TRIT1 in *Schizosaccharomyces*  
40 *pombe* using tRNA-mediated suppression and i6A37-sensitive northern blotting. The TRIT1 MTS  
41 mutations indeed decrease mitochondrial-tRNA modification in *S. pombe*. We also show TRIT1  
42 modification deficiency specific for tRNA<sup>Trp</sup>CCA despite A36-A37-A38, consistent with the negative  
43 effect of the CCA anticodon as was described for Mod5 IPTase. This TRIT1 deficiency can be  
44 countered by over-expression. We propose a model of tRNA-i6A37 identity selection in eukaryotes  
45 that includes sensitivity to substrates with YYA anticodons.

46

47 **AUTHOR SUMMARY**

48 tRNA isopentenyltransferases (IPTases) are tRNA modification enzymes that are conserved in  
49 bacteria and eukaryotes. They add an isopentenyl group to the Adenosine base at position 37,  
50 adjacent to the anticodon of specific subsets of tRNAs that decode codons that begin with Uridine.  
51 This modification stabilizes the otherwise weak adjacent codon-anticodon basepair and increases the  
52 efficiency of decoding of the corresponding codons of the genetic code. IPTases belong to a group of  
53 enzymes that modify both cytoplasmic and mitochondrial tRNAs of eukaryotic cells. Interestingly,  
54 during evolution there were changes in the way that IPTases are targeted to mitochondria as well as  
55 changes in the relative numbers and identities of IPTase tRNA substrates in the cytoplasm vs.  
56 mitochondria, the latter consistent with phenotypic consequences of IPTase deficiencies in fission  
57 and budding yeasts, and mammals. Pathogenic mutations to human IPTase (TRIT1) cause  
58 mitochondrial insufficiency and neurodevelopmental disease, principally due to decreased  
59 modification of the mt-tRNA substrates. In this study, we identify the way human TRIT1 is targeted  
60 to mitochondria. We also show that TRIT1 exhibits a tRNA anticodon identity-specific substrate  
61 sensitivity. The work leads to new understanding of the IPTases and the variable codon identities of  
62 their tRNA substrates found throughout nature.

63

64 **INTRODUCTION**

65 45 different eukaryotic cytoplasmic (cy-) tRNAs contain unique sets of modifications in two groups  
66 [1-3]; those in the body generally contribute to folding and stability, and those in the anticodon loop  
67 (ACL) contribute to mRNA decoding by ribosomes. One ACL modification is isopentenyl addition  
68 to *N*<sup>6</sup> of A37 (i6A37), immediately 3' to anticodons that decode UNN codons. The i6A37 and/or its  
69 derivative (below) has been shown to increase anticodon-codon binding efficiency, promote mRNA  
70 decoding, and decrease frameshifting [reviewed in 4]. Modifications in the anticodon stem loop  
71 (ASL) are more concentrated and diverse relative to the tRNA body, and are involved in

72 modification circuits [5], some of which are disrupted by mutations that cause diseases [6, 7]. In one  
73 ASL circuit, i6A37 is prerequisite for m3C32 formation by Trm140 and related enzymes [8, 9].

74 The tRNA isopentenyltransferases (IPTases) that form i6A37 have been highly conserved and  
75 characterized from human (TRIT1), fission yeast *S. pombe* (Tit1/Sin1), budding yeast *S. cerevisiae*  
76 (Mod5), roundworm *C. elegans* (GRO-1), bacteria *Escherichia coli* (MiaA), and others [4]. IPTases  
77 are members of a minority group of modification enzymes that act on both cytoplasmic (cy)-tRNAs  
78 and mitochondrial (mt)-tRNAs [10, 11]. Bacterial i6A37 are mostly hypermodified to 2-methylthio-  
79 *N*<sup>6</sup>-isopentenyl-A37 (ms2i6A37), whereas eukaryotic cy-tRNAs i6A37 are not. While the mt-tRNAs  
80 of *S. cerevisiae* and *S. pombe* are not hypermodified, the mammalian mt-tRNAs i6A37 are [12-14].

81 Identities of tRNAs with i6A37 vary remarkably in nature. The number of cy-tRNAs-i6A37 is  
82 highest in bacteria, intermediate in yeast and lowest in human (Table 1) [15]. The wide variable  
83 identities of tRNAs that harbor i6A37 among species is in stark contrast to the threonylcarbamoyl-  
84 A37 (t6A37) found on all cy-tRNAs that decode ANN codons in all species (reviewed in [16], also  
85 see [17]). Also notably, tRNA-i6A37 identities vary highly between cytosol and mitochondria  
86 among and within species (Table 1). Much of the documented variability in cy-tRNA-i6A37 identity  
87 is reflected by loss of the IPTase recognition element, A36-A37-A38; as evolutionary complexity  
88 increased, position 37 was occupied more often by G than A in cy-tRNAs that decode UNN codons  
89 [16]. However, this doesn't account for all of the variability; absence of i6A37 from *S. cerevisiae* cy-  
90 tRNA<sup>Trp</sup>CCA, which bears A36-A37-A38, reflects substrate-specific deficiency of Mod5 due to poor  
91 recognition of or negative influence of the CCA anticodon [17]. *S. pombe* Tit1, which differs from  
92 Mod5 in the number and composition of amino acids in its anticodon recognition loop motif, can  
93 readily modify the identical tRNA<sup>Trp</sup>CCA [17]. Thus, different lines of evidence indicate that two  
94 mechanisms have contributed to the species-specific profiles of tRNA-i6A37 identities in these  
95 model organisms and possibly others. This led to the idea that the i6A37 modification system  
96 represents a plastic component of the genetic code [18] and also suggests its adaptability for

97 synthetic biology [19]. Insights into such potential will require understanding of the elements of  
98 differential substrate targeting by the IPTases. Yet, the principles of tRNA identity-recognition for  
99 i6A37 selection are incompletely understood.

100 Work on *S. pombe* and *S. cerevisiae* IPTases used suppressor-tRNAs<sup>Ser</sup>UCA and <sup>Tyr</sup>UAA and a  
101 red -white assay based on decoding premature stop codons in mRNAs for adenine synthesis [20-22].  
102 tRNA-mediated suppression (TMS) can be used to study many facets of tRNA biogenesis [23-32].

103 Human TRIT1 was identified as a tumor suppressor [33], and an allele that encodes TRIT1-  
104 F202L was later found to be associated with modulation of lung cancer survival [34] [also see 35,  
105 36]. IPTases use dimethylallyl pyrophosphate (DMAPP) for i6A37 formation, a substance also used  
106 for sterol synthesis [37], relevant because Mod5 prions inactive for modification, support increased  
107 sterol metabolism and anti-fungal drug resistance [38, 39]. Complementation of *S. cerevisiae* cy-  
108 tRNA<sup>Tyr</sup>UAA-TMS as a test of IPTases [33, 40, 41], showed TRIT1-F202L as active [34]. Using *S.*  
109 *pombe*, substitution of invariant Thr-12 in the P-loop of Tit1 (Fig 1, Tit1-T12A) inactivated it for cy-  
110 tRNA<sup>Ser</sup>-TMS [4, 17]. Tit1 T12A is homologous to the T19A substitution of *E. coli* IPTase which  
111 resulted in the largest decrease in  $k_{cat}$  (600-fold) of all mutations tested [17, 42, 43]. The  
112 corresponding T23 in Mod5 is indeed positioned for catalysis [44]. Thus, an outstanding puzzle has  
113 been that a TRIT1(57-467) variant missing the P-loop entirely as well as D55 (of DSMQ, Fig 1)),  
114 which in Mod5 acts as a general base for catalysis [44], complemented cy-tRNA<sup>Tyr</sup>-TMS [33].  
115 Another enigma is a predicted proteolytic cleavage site upon mitochondrial targeting which would  
116 also remove the N-terminal region from TRIT1. Both of these are addressed by new data below.

117 Proper subcellular trafficking is critical for IPTase function; in yeast, the single nuclear gene-  
118 encoded Mod5 localizes to nuclei, cytoplasm and mitochondria [45-47]. Nuclear Mod5 is involved  
119 in tRNA gene-mediated silencing [48, 49]; its nucleolar colocalization [47] is consistent with this  
120 and with transcriptionally active tRNA genes and early tRNA processing [50, 51]. For some tRNAs,  
121 A36-A37-A38 is interrupted by an intron, and in yeast where tRNA splicing occurs in the cytoplasm,  
122 tRNA nuclear export is prerequisite to i6A37 formation [52]. However, tRNA<sup>Ser</sup>AGA has no intron

123 and may be modified by nuclear Mod5. The Mod5 nuclear localization signal (NLS) is near its C-  
124 terminus [47], following a Zn-finger motif specific to eukaryotic IPTases [4] that binds the tRNA  
125 backbone [44], which has been shown to be required for Tit1 activity [17].

126 Modification of mt-tRNA is a very important IPTase function [12]. Mt-IPTase deficiency is  
127 linked to *C. elegans* longevity [53]. Mutations in TRIT1 cause neurodevelopmental disorder [41,  
128 54]. In this case, most if not all pathophysiology is attributable to hypomodification of mt-tRNA and  
129 impairment of mitochondrial translation and oxidative phosphorylation, even though the cy-tRNAs  
130 are also hypomodified [41]. Human mt-tRNAs-i6A37 decode 13 codons for 5 amino acids in  
131 mitochondria whereas cy-tRNAs-i6A37 decode 5 codons for 1 amino acid in the cytosol (Table 1).

132 *S. cerevisiae* and *C. elegans* use alternative translation initiation to differentially target their  
133 IPTases to mitochondria and cytoplasm [45, 46, 53]. Other IPTase mRNAs do not use alternate starts  
134 and their distribution mechanisms have not been scrutinized. We show that TRIT1 contains an N-  
135 terminal MTS that functions in human and *S. pombe* cells. We employed TMS and i6A37-sensitive  
136 northern blotting to show that TRIT1 modifies cy-and mt-tRNAs in *S. pombe*. Our data also reveal  
137 severe deficiency of TRIT1 for cy-tRNA<sup>Trp</sup>CCA specifically, despite the A36-A37-A38 sequence,  
138 consistent with negative effects of the CCA anticodon as was described for Mod5 IPTase. We  
139 present a model of eukaryotic i6A37 modification based on enzyme concentration and substrate  
140 preference that extends to conditional YYN codon recognition, includes differential subcellular  
141 localization, and suggests a role for prerequisite influence by U34 and C34 modification.

142

## 143 **RESULTS**

144 **TRIT1 bears a mitochondrial targeting sequence (MTS) but may not undergo cleavage.** As  
145 noted previously [41], mitochondrial targeting of human TRIT1 was predicted with high confidence  
146 by the online tool, MitoProt II (<http://ihg.gsf.de/ihg/mitoprot.html>) [55], which also predicted a  
147 proteolytic cleavage site after amino acid 47. However, such cleavage would remove the highly  
148 conserved P-loop likely important for catalytic activity (Fig 1). We also used the prediction

149 algorithms MitoFates [56] and iPSORT [57] to analyze the human TRIT1 sequence. iPSORT  
150 predicted a MTS within the first 30 amino acids but doesn't predict cleavage. MitoFates was  
151 designed to be an improved method for predicting cleavable N-terminal MTSs, referred to as  
152 presequences, and their cleavage sites [56]. MitoFates predicted a MTS comprised of a TOM20  
153 (translocase of the outer mitochondrial membrane-20) receptor binding site at amino acids 5-10  
154 (AAARAV, Fig 1) followed by an amphipathic helix at 11-23 (PVGSGLRGLQRTL), but with a low  
155 probability of a cleavable presequence of 0.106, well below MitoFates default cutoff of 0.5. Low  
156 probability of a cleavable presequence is consistent with biochemical subfractionation that revealed  
157 no evidence of size difference between lysate and matrix-localized TRIT1 in a gel that revealed size  
158 difference for matrix-localized GDH [41]. We note that the cNLS mapper [58] predicted overlapping  
159 mono- and bi-partite importin-dependent nuclear localization signals at 420-453 of TRIT1.

160 We created GFP fusion constructs to test for mitochondrial localization by confocal microscopy  
161 in human embryonic kidney (HEK)-293 cells (Fig 2A, B). To test for MTS activity of the TRIT1 N-  
162 terminal region we fused only its first 51 amino acids to GFP, as in TRIT1(1-51)-GFP, and  
163 examined it for mitochondrial targeting. Two point mutations, R17E and R21E, in the basic  
164 amphipathic helix component of the predicted MTS (Fig 1) were made in two contexts, the N-  
165 terminal fusion 1-51 construct, TRIT1(1-51:R17E/R21E)-GFP, and full length TRIT1(R17E/R21E)-  
166 GFP. These and other constructs were transfected into HEK293 cells. After 48 hr the cells were  
167 fixed and exposed to MitoTracker to stain mitochondria red and with Hoechst to stain nuclei blue  
168 (Fig 2B). Cell lysates were examined for protein expression by western blot using anti-GFP antibody  
169 (Fig 2C). GFP alone localized diffusely in cytosol and nuclei consistent with diffusion for its mass of  
170 ~25 kDa (Fig 2B, column 1). Full length TRIT1-GFP was found localized to nuclei and cytosol with  
171 some evidence of mitochondrial localization reflected by overlap of GFP and MitoTracker as a  
172 stippling yellow-orange pattern in the merge (Fig 2B, column 2, lower panel). This pattern was not  
173 observed with full length TRIT1(R17E/R21E)-GFP containing the MTS mutations, which  
174 accumulated in nuclei and was not found to localize to mitochondria (Fig 2B, column 3). We note

175 from these results that most cytoplasmic TRIT1 would appear to be due to mitochondrial localization  
176 (Discussion). The fragment lacking the first 51 amino acids, TRIT1(52-467)-GFP, which did not  
177 accumulate to the same levels as the other proteins (Fig 2C). This fusion protein was found  
178 expressed in fewer transfected cells than the other constructs and although we do not know the basis  
179 of this, some cells appeared to contain aggregates of GFP (data not shown). In cells in which  
180 aggregates were not observed, TRIT1(52-467)-GFP was accumulated in nuclei (Fig 2B, column 6).

181 The strongest evidence of mitochondrial localization by the TRIT1 MTS came from TRIT1(1-  
182 51)-GFP. First, GFP alone produced a diffuse pattern in nuclei and cytoplasm, with nuclei generally  
183 more intense (column 1). By contrast, TRIT1(1-51)-GFP (column 4) was more intense in the  
184 cytoplasm and with punctate foci that colocalized with MitoTracker. Second, these characteristics  
185 including colocalized punctate foci were not observed with the point mutant, TRIT1(1-  
186 51:R17E/R21E)-GFP (Fig 2B, column 5). The data support the predicted amphipathic helix as a part  
187 of the TRIT1 MTS because substitution of R17 and R21 impaired mitochondrial targeting.

188 Data here and not shown provide evidence that TRIT1 contains multiple trafficking elements  
189 that distribute it to different subcellular compartments, similar to but distinct from Mod5 [45-47, 49,  
190 59, 60]. Mutation of the MTS shifts distribution away from mitochondria. Importantly, as will be  
191 shown in a later section, the R17E/R21E MTS mutations specifically impair i6A37 modification of  
192 mt-tRNA, but not cy-tRNA modification by TRIT1.

193

194 **Complementation of cy-tRNA<sup>Ser</sup>-mediated suppression in *S. pombe*.** It was shown by monitoring  
195 the codon-specific insertion of an amino acid in the active site of  $\beta$ -galactosidase that is critical for  
196 enzymatic activity, that i6A37 increases the decoding activity of cy-tRNA<sup>Cys</sup>GCA by ~3-fold in *S.*  
197 *pombe* [42]. Here, we used a codon-specific reporter for cy-tRNA<sup>Ser</sup>UCA-TMS, to examine if TRIT1  
198 mutants can functionally complement *S. pombe* deleted of its IPTase, *tit1* $\Delta$  (Fig 3A). In this TMS  
199 assay, isopentenylolation of cy-tRNA<sup>Ser</sup>UCA is required for suppression of premature translation



200 termination at a UGA stop at codon position 215 of *ade6-704* mRNA [61], which results in a  
201 decrease in intracellular red pigment [32]. The control strain yYH1 (*tit1*<sup>+</sup>) used as a reference, and  
202 the test strain yNB5 (*tit1*Δ), contain the same suppressor-tRNA<sup>Ser</sup>UCA allele [17]. yYH1 (*tit1*<sup>+</sup>) is  
203 pink (moderately suppressed) whereas yNB5 (*tit1*Δ) transformed with empty vector pRep82X is  
204 unsuppressed, red (Fig 3A, sectors 1 and 2). Transformation of yNB5 with pRep-Tit1 under  
205 transcriptional control of the *tit1*<sup>+</sup> promoter, or pRep82X-TRIT1 under the *nmt1*<sup>+</sup> promoter led to  
206 suppressed, lighter color yeast (sectors 3 and 4). We note that pRep82X carries the weakest *nmt1*<sup>+</sup>  
207 promoter available in the pRepX expression vectors [62, 63]. pRep-Tit1-T12A is inactive [17]  
208 (sector 5). pRep82X-TRIT1-T32A and pRep82X-TRIT1(57-467) are also inactive (sectors 6 and 8).  
209 pRep82X-TRIT1(R17E/R21E) led to suppression (sector 7) comparable to TRIT1 (sector 4),  
210 providing evidence that the mutations that interfere with mitochondrial targeting in human cells do  
211 not impair cy-tRNA<sup>Ser</sup>UCA-TMS in *S. pombe*.

212 RNA from cells represented in Fig 3A were examined for modification of cy-tRNA<sup>Tyr</sup>GUA as  
213 determined by an i6A37-sensitive northern blot assay (methods, Fig 3B). This confirmed that  
214 TRIT1-T32A, TRIT1(57-467) and Tit1-T12A were inactive while TRIT1 and TRIT1(R17E/R21E)  
215 were active for i6A37 modification, and Tit1 was more active (Fig 3B).

216

217 **Moderate over-expression does not rescue inactive TRIT1 alleles for cy-tRNA<sup>Ser</sup>UCA TMS.** As  
218 noted in the Introduction, a TRIT1(57-467) isoform predicted to encode a protein beginning with  
219 MQVYEGLD (see Fig 1) was active for cy-tRNA<sup>Tyr</sup>UAA-TMS in *S. cerevisiae* [33]. Because  
220 pRep82X-TRIT1(57-467) was inactive for cy-tRNA<sup>Ser</sup>-TMS in *S. pombe* (Fig 3), we suspected the  
221 discrepancy between the studies might be due to expression levels; use in *S. cerevisiae* of a high  
222 copy plasmid with a very strong promoter (*GALI*) would produce large amounts of TRIT1(57-467)  
223 [33]. We therefore compared TMS activity from expression constructs with the weakest and  
224 strongest *nmt1*<sup>+</sup> promoters, pRep82X and pRep4X, respectively (Fig 3C). These *nmt1*<sup>+</sup> promoters

225 fused to chloramphenicol acetyltransferase (CAT) or *LacZ*, showed 45-75 fold differences in output  
226 [62, 63]. pRep4X-TRIT1(57-467) did indeed produce substantially more accumulation of TRIT1(57-  
227 467) than did pRep82X-TRIT1(57-467) (Fig 3D), although without a hint of increased TMS activity  
228 relative to pRep82X-TRIT1(57-467) (Fig 3C). Likewise, TRIT1-T32A remained inactive in pRep4X  
229 (Fig 3C) as did Tit1-T12A (not shown). TRIT1-F202L, was as active as TRIT1 and also not limited  
230 by expression levels, and this was also true for TRIT1-(R17E/R21E) (Fig 3C).

231

232 **TRIT1 is severely and specifically deficient for cy-tRNA<sup>Trp</sup>CCA modification.** Distinct  
233 combinations of tRNAs-i6A37 contribute to the cytosolic translation machineries of *S. cerevisiae*, *S.*  
234 *pombe* and human cells (Table 1). As noted, cy-tRNA<sup>Trp</sup>CCA carries unmodified A37 in *S. cerevisiae*  
235 despite an A36-A37-A38 sequence [15], consistent with poor substrate activity for Mod5 IPTase; in  
236 contrast, the *S. pombe* IPTase, Tit1 most readily modifies this and all cy-tRNAs<sup>Trp</sup>CCA tested [17].  
237 Limited experimental data suggest that some of this discrimination resides in a variable anticodon  
238 recognition loop of the IPTase [17] (Discussion). More relevant here is that both the human and *S.*  
239 *cerevisiae* mt-tRNAs<sup>Trp</sup> which contain i6A37 are encoded to produce UCA anticodons in which the  
240 U34 obtains a bulky modification, rather than CCA (Table 1, Discussion). Therefore, we wanted to  
241 examine the extent to which TRIT1 could modify *S. pombe* cy-tRNA<sup>Trp</sup>CCA and mt-tRNA<sup>Trp</sup>CCA.

242 TRIT1 was indeed deficient for modification of cy-tRNA<sup>Trp</sup>CCA, reminiscent of Mod5, but more  
243 severe when compared side-by-side (Fig 4A-C). Fig 4A shows results of an i6A37-sensitive PHA6  
244 blot assay for cy-tRNAs<sup>Trp</sup>CCA, <sup>Tyr</sup>GUA and <sup>Ser</sup>AGA. The PHA6 (Positive hybridization in Absence of  
245 i6A37) assay is based on loss of oligo-DNA probe hybridization to the ACL due to presence of  
246 i6A37, and is calibrated for quantitation by a body probe to the T stem loop on the same tRNA (Fig  
247 4B, C) [14, 17, 42, 64]. In addition to Mod5, we included two mutants, Mod5-M1A and Mod5MTS-  
248 TRIT1, that are important below for assessing modification of the mt-tRNA<sup>Trp</sup>CCA. TRIT1 (and  
249 Mod5MTS-TRIT1) is deficient for cy-tRNA<sup>Trp</sup>CCA modification as reflected by strong hybridization  
250 signal in lane 1 relative to lanes 2 (Mod5) and lane 6 (Tit1) of Fig 4A upper panel. These signal

251 differences are less dramatic for cy-tRNA<sup>Tyr</sup>GUA (Fig 4A, middle panel) and cy-tRNA<sup>Ser</sup>AGA (lower  
252 panel) (Fig 4A). Thus, cy-tRNA<sup>Trp</sup>CCA exhibits very low substrate activity specific to TRIT1 (and  
253 Mod5MTS-TRIT1), and relative to cy-tRNAs<sup>Tyr</sup>GUA and <sup>Ser</sup>AGA in the same cells. By contrast to  
254 TRIT1, cy-tRNA<sup>Trp</sup>CCA is most efficiently modified by Tit1 followed by Mod5 (Fig 4A, lanes 6, 2,  
255 1; and compare black with gray bars in Fig 4C). The pattern obtained with ectopic pRep-Tit1 was  
256 similar to yYH1(*tit1*<sup>+</sup>) (not shown).

257

258 **TRIT1 modifies mt-tRNA<sup>Trp</sup>CCA in *S. pombe*.** Analysis of *S. pombe* mt-DNA by tRNA<sup>scan</sup>-SE  
259 predicted 25 mt-tRNAs (including 3 for Met), of which two, mt-tRNA<sup>Trp</sup>CCA and mt-tRNA<sup>Cys</sup>GCA  
260 contain an AAA recognition element. Prior studies using standard PHA6 assay conditions accounted  
261 for i6A37 modification of mt-tRNA<sup>Trp</sup>CCA at 25-30% in yYH1(*tit1*<sup>+</sup>) cells but only background  
262 levels on mt-tRNA<sup>Cys</sup>GCA, while it was >75% on cy-tRNAs on the same blots [14, 42]. For the  
263 present study, we determined that increasing the post-hybridization wash temperature, to 10-12.5°C  
264 above standard conditions is necessary to reveal a difference in signal between IPTase positive and  
265 negative sample mt-tRNAs (see Supp Fig S1). As shown below, these optimal conditions revealed  
266 mt-tRNA<sup>Trp</sup>CCA modification at ~75% for Tit1 and Mod5 but reproducibly only ~20% for TRIT1  
267 (Fig 4D-F). By contrast, cy-tRNA<sup>Ser</sup>AGA was modified to ~70% by TRIT1 in the same cells, and 80-  
268 90% by Mod5 and Tit1 (Fig 4A-C).

269 We considered that multiple variables may contribute to tRNA i6A37 modification efficiency. In  
270 the cytosol, cy-tRNA<sup>Trp</sup>CCA is an inherently poor substrate that must compete for IPTase activity  
271 with variable-abundance multi-copy tRNA gene-derived cy-tRNA<sup>Tyr</sup>GUA, cy-tRNA<sup>Ser</sup>AGA, and cy-  
272 tRNA<sup>Ser</sup>UGA. In mitochondria, competition is predictably less because mt-tRNA<sup>Trp</sup>CCA and mt-  
273 tRNA<sup>Cys</sup>GCA sequences are single copy in mt-DNA. Another variable for mt-tRNAs may be the  
274 IPTase concentration in the mitochondrial matrix, which is likely governed by their MTS activity.

275 It was previously shown that the MOD5 MTS is required for i6A37 modification of mt-  
276 tRNA<sup>Trp</sup>C<sub>CA</sub> in *S. pombe* [14]. We examined MTS activity by first comparing N-terminal fusions as  
277 schematized in Fig 4D; codons 1-28 of TRIT1 were replaced with codons 1-19 of MOD5. We  
278 confirmed that Mod5-M1A, which initiates at M12 and lacks a MTS [45, 46], was deficient for mt-  
279 tRNA<sup>Trp</sup>C<sub>CA</sub> modification relative to Mod5 (Fig 4E, F). Fig 4E, F also show that Mod5MTS-TRIT1  
280 exhibited >2-fold more modification of mt-tRNA<sup>Trp</sup>C<sub>CA</sub> than TRIT1. In any case, TRIT1 and  
281 Mod5MTS-TRIT1 led to higher levels of modification of mt-tRNA<sup>Trp</sup>C<sub>CA</sub> than of cy-tRNA<sup>Trp</sup>C<sub>CA</sub>  
282 (Fig 4C vs. 4F, and below). These results suggest that TRIT1 can modify mt-tRNA<sup>Trp</sup>C<sub>CA</sub> more  
283 efficiently than cy-tRNA<sup>Trp</sup>C<sub>CA</sub> in *S. pombe* as will be corroborated in Fig 6 below.

284

285 **TRIT1 MTS-dependent i6A37 modification of mt-tRNA<sup>Trp</sup>C<sub>CA</sub> and mt-tRNA<sup>Cys</sup>G<sub>CA</sub>.** We  
286 functionally validated the TRIT1 MTS in *S. pombe* by examining mt-tRNA modification (Fig 5A-E).  
287 Raising TRIT1 levels with the strongest *nmt1*<sup>+</sup> promoter, pRep4X-TRIT1 increased mt-tRNA<sup>Trp</sup>C<sub>CA</sub>  
288 modification to ~45% (Fig 5A, E), higher than the ~20% achieved with pRep82X-TRIT1 (Fig 4F).  
289 Importantly, biological triplicate determinations revealed that the MTS mutations in pRep4X-  
290 TRIT1(R17E/R21E) lowered mt-tRNA<sup>Trp</sup>C<sub>CA</sub> modification to ~6% while modification of cy-  
291 tRNA<sup>Tyr</sup>G<sub>UA</sub> was not affected by these mutations, and the negative control proteins, TRIT1-T32A  
292 and TRIT1(57-467) showed negligible modification (Fig 5A, E). Similar to mt-tRNA<sup>Trp</sup>C<sub>CA</sub>, mt-  
293 tRNA<sup>Cys</sup>G<sub>CA</sub> modification was negligible with pRep4X-TRIT1(R17E/R21E) (Fig 5B, E). We note  
294 that mt-tRNA<sup>Trp</sup>C<sub>CA</sub> and mt-tRNA<sup>Cys</sup>G<sub>CA</sub> were determined to be 80% and 90% modified  
295 respectively in yYH1(*tit1*<sup>+</sup>) cells (Fig 5B, E). Thus, the R17E/R21E mutations that impaired TRIT1  
296 MTS-mediated localization in HEK293 cells, also impaired modification of mt-tRNA<sup>Trp</sup>C<sub>CA</sub> and mt-  
297 tRNA<sup>Cys</sup>G<sub>CA</sub> in *S. pombe* mitochondria, while they had no effect on cy-tRNA<sup>Tyr</sup>G<sub>UA</sub> (Fig 5E) nor on  
298 cy-tRNA<sup>Ser</sup>U<sub>CA</sub>-mediated TMS (Fig 3A). The data provide strong evidence that the TRIT1 MTS is  
299 functional in *S. pombe*.

300

301 **TRIT1 concentration-dependent modification of the inferior substrate, cy-tRNA<sup>Trp</sup>CCA.** We  
302 wanted to examine if further elevation of cytosolic TRIT1 levels could lead to increased  
303 modification of cy-tRNA<sup>Trp</sup>CCA. For this we made use of the Mod5MTS sequence for its high level  
304 production of cytosolic protein due to the very favorable context of its M12 ATG for translation  
305 initiation [65], for TRIT1 expression in *S. pombe* (Fig 6A-C). Studies of MOD5 have shown that  
306 suboptimal context of its first ATG (M1) accounts for relatively low levels (~10%) of the MTS-  
307 containing isoform, IPPT-I, as compared to the IPPT-II isoform (~90%) that begins at ATG (M12),  
308 which resides within a strong consensus for efficient initiation [65-67] (Fig 6A,B). As cloned in the  
309 *Xho*I sites of pRep 82X and 4X, the context upstream of ATG (M1) of both TRIT1 and Mod5MTS-  
310 TRIT1 constructs are identical but suboptimal because they lack A at -3, a most conserved and  
311 influential position [66, 67] (Fig 6A, *pRepXho*I). This suggests that both pRepX-TRIT1 and pRepX-  
312 Mod5MTS-TRIT1 undergo comparable 'leaky scanning' (i.e., inefficient) initiation at their first  
313 ATG, M1, and that a higher level of TRIT1 produced by Mod5MTS-TRIT1 would be due to more  
314 efficient initiation at the second ATG, M12, the cytoplasmic isoform, as a result of its better context  
315 (Fig 6A, B). Examination of TRIT1 expression was largely consistent with these expectations (Fig  
316 6C, D, the calculated mass of full length TRIT1 is 52.7 kDa). As expected, the Mod5MTS-TRIT1  
317 constructs produced higher levels than the corresponding pRep4X and pRep82X constructs (Fig 6C,  
318 lanes 1-4). Importantly, blocking initiation of the cytoplasmic-specific isoform with the substitution  
319 mutation, M12A, reduced TRIT1 protein levels by ~10-fold (Fig 6C, D, compare lanes 5 and 3),  
320 providing evidence that the excess TRIT1 produced by pRepX-Mod5MTS-TRIT1 over that  
321 produced by pRepX-TRIT1 represents cytoplasmic protein.

322 Indeed, cells expressing higher levels of cytoplasmic TRIT1 exhibited >7-fold increase in  
323 modification of cy-tRNA<sup>Trp</sup>CCA compared to cells with lower levels (Fig 6E, F, compare black bars  
324 for pRep4X-TRIT1 vs pRep4X-Mod5MTS-TRIT1). The cytoplasmic concentration-dependent  
325 increase in modification appeared specific for cy-tRNA<sup>Trp</sup>CCA which increased >7-fold whereas cy-  
326 tRNA<sup>Tyr</sup>GUA was unaffected (Fig 6F).

327           Because TRIT1 does not appear to use alternative translation initiation to control its IPTase  
328           distribution to mitochondria and other subcellular locations (see Fig 1, 2), we cannot estimate what  
329           fraction of the total TRIT1 protein in lane 1 of Fig 6C is cytoplasmic and/or mitochondrial. To  
330           determine the relative concentrations in cytoplasm vs. mitochondrial matrix in human cells is beyond  
331           the scope of this study. Examination of the ATG context of native TRIT1 (Fig 6A, line 7) indicates  
332           that it resides in a reasonably good Kozak consensus that would direct a large fraction of TRIT1 to  
333           the mitochondria, consistent with our GFP-fusion imaging.

334

## 335   **DISCUSSION**

336           In this study we demonstrated that human TRIT1 uses an N-terminal MTS for mitochondrial  
337           localization in human cells and also showed it to be functional in *S. pombe*. As reviewed in the  
338           Introduction, proper subcellular localization is critical for IPTase function; in *S. cerevisiae*, the  
339           mechanisms by which Mod5 localizes to nuclei, cytoplasm and mitochondria have been extensively  
340           investigated [45-47, 65, 68, 69]. *S. cerevisiae* Mod5 (as well as *C. elegans* GRO-1) uses alternative  
341           translation initiation sites to target to mitochondria or cytoplasm [45, 46, 53]. Our analyses indicate  
342           that TRIT1 uses a single translation start site. Mitochondrial activity of TRIT1 is relevant because  
343           pathogenic mutations to it that decrease i6A37 modification of both cy-tRNAs and mt-tRNAs,  
344           manifest in patients principally as mitochondrial insufficiency due to impairment of the  
345           mitochondrial translational system [41] [also see 54]. We should note that the majority of pathogenic  
346           SNPs in TRIT1 described [41, 54], do not reside within or near the MTS examined here, (one allele  
347           of a compound heterozygous genotype predicts a truncation at Arg-8) [54]. Examining the N-  
348           terminal MTS was also important because a popular algorithm predicts presequence cleavage at  
349           position 47 which would remove residues critical for modification activity, including the conserved  
350           P-loop containing the invariant catalytic T32, which we showed is required for efficient modification  
351           activity of cy- and mt-tRNAs. A resolution of this problem was provided by the MitoFates algorithm  
352           [56], which is an improved method for predicting cleavable N-termini MTSs, and indeed predicts a

353 two component N-terminal MTS for TRIT1 (Fig 1) but with very low probability of cleavage.  
354 Subcellular fractionation had shown that TRIT1 colocalized to the lysate, mitochondria, and the  
355 mitochondrial matrix fractions but with no evidence of cleavage [41]. Thus, our data and other  
356 analysis favor a model in which the N-terminal MTS directs mitochondrial import of TRIT1 but do  
357 not support cleavage. Furthermore, this work has established a *S. pombe* system that can be used to  
358 study the efficacy of TRIT1 MTS for functional mt-tRNA i6A37 modification.

359 Another conclusion is that the TRIT1 IPTase exhibits substrate-specific deficiency for cy-  
360 tRNA<sup>Trp</sup>CCA modification relative to the Mod5 and Tit1 IPTases, despite the presence of the A36-  
361 A37-A38 sequence identity element in this tRNA. The AAA sequence within the anticodon loop was  
362 known to be a major identity element for *E. coli* IPTase, and to be influenced by specific base pairs  
363 in the anticodon stem, as well as certain characteristics of the loop itself [70]. Our data are consistent  
364 with the earlier findings but are distinct in that they show significant differences among eukaryotic  
365 IPTases that are relevant to the variable identities of tRNAs-i6A37 found in nature (Table 1). We  
366 show that increasing the cytoplasmic concentration of TRIT1 is able to partially overcome the poor  
367 substrate activity of the cy-tRNA<sup>Trp</sup>CCA substrate (Fig 6).

368

369 **The N-terminal MTS of TRIT1.** As noted above, MitoProt II [55] predicted an N-terminal MTS  
370 for TRIT1 with high probability, and with a post-import cleavage at position 47 which is at odds  
371 with our mutagenic analysis and prior characterization of critical catalytic residues in other IPTases,  
372 and supported by crystallographic studies in which Mod5 was observed bound to tRNA<sup>Cys</sup>GCA  
373 together with a DMAPP analog substrate. TRIT1-T32A and Tit1-T12A are homologous to *E. coli*  
374 IPTase MiaA-T19A, a substitution that resulted in the largest decrease in  $k_{cat}$  (600-fold) of all  
375 mutations tested [17, 42, 43]. The corresponding T23 in the Mod5 structure is positioned adjacent to  
376 DMAPP for catalysis [44]. Thus, it is important to emphasize that MitoFates [56], which was  
377 designed as an improved prediction method for N-terminal MTSs and their cleavage sites, predicted  
378 a N-terminal MTS comprised of a TOM20 receptor binding site followed by an amphipathic helix

379 (Fig 1) but with low probability of cleavage, 0.106, well below the default cutoff. The conclusion  
380 that the N-terminal 11 amino acids of Mod5 are necessary for mitochondrial import and that the MTS  
381 presequence is probably not proteolytically removed after import [45], are supported by a MitoFates  
382 analysis that indeed predicts positively charged amphiphilicity within the first 11 amino acids but  
383 with a very low probability of cleavage, of 0.026. That study also indicates that the Mod5 MTS is  
384 not fully efficient at import, as a functional pool of N-terminal extended protein remained in the  
385 cytoplasm [45]. Our data with Mod5MTS-M12A-TRIT1, are consistent with this as it retained  
386 substantial i6A37 modification activity for cy-tRNAs (data not shown).

387 TRIT1 localizes to the mitochondrial matrix, where modified mt-tRNAs function in human cells,  
388 although with no evidence of cleavage, whereas GDH (glutamate dehydrogenase), a matrix-specific  
389 protein, exhibited evidence of cleavage [41]. Point mutagenesis of the two key basic residues in the  
390 TRIT1 MTS amphipathic helix debilitated mitochondrial localization in human cells (Fig 2) and also  
391 debilitated TRIT1 for i6A37 modification of mt-tRNAs, but not cy-tRNAs in *S. pombe* cells (Fig 5).  
392 The data indicate that TRIT1 has a N-terminal MTS comprised of a TOM20 receptor binding site  
393 followed by an amphipathic helix (Fig 1) but is probably not cleaved.

394 Amounts of TRIT1 in mitochondrial and submitochondrial fractions, and sensitivity to  
395 proteinase treatment relative to GDH raised the possibility that a significant fraction of cytoplasmic  
396 TRIT1 may be associated with the outer mitochondrial membrane [41]. We note that such a  
397 possibility is consistent with our GFP-fusion construct imaging in which a substantial amount of  
398 cytoplasmic TRIT1(1-51)-GFP and TRIT1-GFP would appear to be associated with mitochondria  
399 (Fig 2B).

400

401 **IPTase function and the variable identities of their associated tRNAs-i6A37.** Data reported here  
402 support the idea that IPTases can discriminate against substrate tRNAs in an anticodon identity type  
403 manner, at least with regard to the TrpCCA anticodon, consistent with Mod5 structural studies that  
404 show base-specific contacts to G34 of tRNA<sup>Cys</sup> [44]. Biochemical and *in vivo* data showed that a



405 point substitution to the anticodon of cy-tRNA<sup>Trp</sup>CCA from C34 to G34 rescued its substrate activity  
406 for Mod5 [17]. A question that arises is how might this relate if at all, to the variable identities of  
407 tRNAs-i6A37 that are found in different eukaryotes?

408 The i6A37 modification was known to increase ribosome binding [71] and functional efficiency  
409 of several suppressor-tRNAs derived from natural tRNAs that decode UNN codons, although to  
410 different extents [72]. Early work led to the proposal that i6A37 could stabilize the otherwise weak  
411 base pairing between the codon U1 base and anticodon base A36, and structural evidence supports  
412 this for tRNA<sup>Phe</sup>GAA-ms2i6A37 bound to a UUC codon in the decoding center of the ribosome [73].  
413 Studies in *S. pombe* supported the conclusion that i6A37 increases the translational activity of  
414 tRNAs by 3-to-4 fold generally [42]. This is consistent with the idea that i6A37 increases the affinity  
415 for ribosome binding and the functional efficiency for translation of tRNA [71]. Recent high  
416 resolution data from *mod5*-deletion cells that revealed dramatic decreases in A site ribosome  
417 occupancies over all of the *S. cerevisiae* tRNA-i6A37-cognate codons [74], fit with a model in which  
418 absence of i6A37 decreases the affinity of the associated tRNAs for the translating ribosome.

419 However, apart from increasing the general translation activity of associated tRNAs, i6A37 may  
420 exert other, specific activities, for example, protection against frameshifting and mistranslation by  
421 near-cognate tRNAs, in a codon-specific and/or context-specific manner [42, 75, 76]. Lines of  
422 evidence indicate that i6A37 and/or its derivatives can exhibit such tRNA-specific and codon- and/or  
423 context-dependent effects [see 72]. We should therefore suspect that some of the variability of  
424 tRNA-i6A37 identities may reflect that in eukaryotes, in which tRNA gene copy number is variable  
425 and dynamic [77-81], other mechanisms may compensate for lack of i6A37 on some tRNAs.

426 Differences in the identities of tRNAs that have been selected or not for i6A37 modification can  
427 be due to sequence differences in the 37 and 38 positions, which contribute to the major IPTase  
428 identity element, A36-A37-A38 or to species-specific characteristics of the IPTase, the latter as first  
429 reported for Mod5 [17] and extended in this study to TRIT1. Thus, cumulative data now more firmly  
430 indicate that both mechanisms contribute to tRNA-specific selection for i6A37 modification in the

431 cytosolic and mitochondrial translation systems of eukaryotes (Table 1), and that this identity  
432 appears to reside at least to some extent, i.e., for cy-tRNA<sup>Trp</sup>CCA, in the anticodon itself.

433 The i6A37 modification is found on nine of ten bacterial tRNAs that bear NNA anticodons  
434 (Table 1). This suggests that ancient IPTases had broad recognition accommodation of tRNAs with  
435 UNN codons [70] with the exception of tRNA<sup>Ser</sup>GGA even though it bears A36-A37-A38, although  
436 this is not a substrate in eukaryotes which do not have functional genes for this tRNA [16, 81-83].  
437 The data that show that both Mod5 and TRIT1 exhibit low activity for cy-tRNA<sup>Trp</sup>CCA relative to  
438 Tit1 and to other cy-tRNAs with the A36-A37-A38 identity element is consistent with the idea that  
439 eukaryotic IPTases and their translation systems evolved decreased requirements among the UNN  
440 decoding tRNAs for i6A37 modification (Table 1).

441

442 **Insight into discrimination against CCA anticodon recognition by eukaryotic IPTases.** It was  
443 previously reported that budding yeast IPTase, Mod5 discriminates against the cy-tRNA<sup>Trp</sup>CCA  
444 substrate whereas fission yeast Tit1 does not [17]. It is clear from the present work that mammalian  
445 TRIT1 IPTase also discriminates against the cy-tRNA<sup>Trp</sup>CCA substrate. Although humans have a  
446 naturally limited cy-tRNA substrate repertoire [64] (Table 1), examining TRIT1 in *S. pombe* along  
447 with Mod5 afforded us the opportunity to assess its activity on an array of substrates not otherwise  
448 readily available in an *in vivo* setting. This revealed two interesting results, that MOD5 exhibited  
449 more activity for *S. pombe* cy-tRNA<sup>Trp</sup>CCA in *S. pombe* than it exhibits for *S. cerevisiae* cy-  
450 tRNA<sup>Trp</sup>CCA in *S. cerevisiae*, and that TRIT1 was more severely impaired than Mod5 for  
451 modification of *S. pombe* cy-tRNA<sup>Trp</sup>CCA. With regard to the former we note that Mod5 expression  
452 in *S. pombe* was directed by the strong *nmt1*<sup>+</sup> promoter from the high copy plasmid (~20/cell).  
453 Because accumulation *in vivo* can be influenced by protein sequence as well as mRNA determinants,  
454 comparison of different IPTases at the same concentration is not expected. Nonetheless, the low  
455 activity of *S. pombe* cy-tRNA<sup>Trp</sup>CCA as a Mod5 substrate as compared to cy-tRNA<sup>Tyr</sup>GUA, cy-  
456 tRNA<sup>Ser</sup>UCA and cy-tRNA<sup>Ser</sup>AGA, and as compared to Tit1 which modifies cy-tRNA<sup>Trp</sup>CCA as well as

457 the other substrates, was evident (Figs 3A, 4C). It was further evident that TRIT1 was more severely  
458 specifically impaired for cy-tRNA<sup>Trp</sup>CCA modification than Mod5 (Fig 4C).

459 An unexplained observation is the ~10-fold disparity with which pRep4X-TRIT1 modifies the  
460 mitochondrial and cytoplasmic tRNAs<sup>Trp</sup>CCA, at 50% and 4%, respectively in *S. pombe* (Fig 6F).  
461 Although the basis for this is unknown, as described below, we suspect differential position 34  
462 modification. This in part because the DNA encoding the anticodon loops and the proximal base pair  
463 at the stem are identical in these tRNAs, and each of the other stem-loops share the same number of  
464 nucleotides (Fig 7A-C). As noted, the exact sequence of the anticodon stem of the poor substrate,  
465 tRNA<sup>Ser</sup>GGA significantly impacts activity for the MiaA IPTase [70]. However, this system of  
466 nucleotide identity that is applicable to MiaA:tRNA<sup>Ser</sup>GGA anticodon stem recognition cannot  
467 account for the disparity here since the most negative element in that study, a G30-U40 base pair, is  
468 present in the more favorable TRIT1 substrate, mt-tRNA<sup>Trp</sup>CCA but replaced by G30-C40 in the less  
469 favored cy-tRNA<sup>Trp</sup>CCA, and the second most positive feature, purines at positions 29 and 30, is  
470 lacking in mt-tRNA<sup>Trp</sup>CCA but present in cy-tRNA<sup>Trp</sup>CCA (Fig 7A, B). Thus, either TRIT1 does  
471 exhibit anticodon stem recognition but is very different from that of MiaA or another basis explains  
472 the apparent discrimination by TRIT1 observed for cy- relative to the mt- tRNA<sup>Trp</sup>CCA.

473 Because the mt- and cy- tRNAs<sup>Trp</sup>CCA exhibit 10-fold difference in substrate activity for TRIT1  
474 in the cytosol and mitochondria of *S. pombe*, but are identical in their anticodon loops and of similar  
475 structure elsewhere with ~50% sequence identity (Fig 7C), based on available data, it should be  
476 considered that they may be differentially modified on C34. First, the C at position 34 most strongly  
477 sensitizes Mod5 to the negative influence of the CCA anticodon [17].

478 Although the modification status of *S. pombe* mt- and cy- tRNAs<sup>Trp</sup>CCA are unknown, *S.*  
479 *cerevisiae* cy-tRNA<sup>Trp</sup>CCA carries Cm at 34 whereas *E. coli* and some other prokaryotes carry  
480 unmodified C34 [84]. As noted (Table 1), mammalian and *S. cerevisiae* mt-tRNA<sup>Trp</sup>UCA are  
481 encoded with U at position 34 and are modified with the bulky groups, tm<sup>5</sup>U and cmnm<sup>5</sup>U,

482 respectively (Table 1) [12, 84, 85]. Because Mod5 doesn't modify *S. cerevisiae* cy-tRNA<sup>Trp</sup>CCA  
483 bearing Cm34 and A36-A37-A38, but does modify mt-tRNA<sup>Trp</sup>UCA bearing cmnm<sup>5</sup>U34 and A36-  
484 A37-A38, it is tempting to speculate that the bulky modified uridines specifically enhance the  
485 activities of their substrate tRNAs for the Mod5 and TRIT1 IPTases. Data and observations that are  
486 consistent with this perspective follow.

487 Investigation of *S. cerevisiae* cy-tRNA<sup>Trp</sup>CCA ASL revealed that the single most important  
488 determinant of its low substrate activity for Mod5 was identity at position 34 [17], consistent with a  
489 cocrystal structure of Mod5 side chain-purine specific contact to position 34 of bound tRNA<sup>Cys</sup>GCA  
490 [44]. A unique feature of the CCA anticodon among other nuclear-encoded eukaryotic IPTase tRNA  
491 substrates that is associated with low activity for Mod5 is that it bears pyrimidines at both the 34 and  
492 35 positions [17]. Two substitutions to C34 that activated the ASL substrate most were G followed  
493 by U [17]. A single C34G substitution to cy-tRNA<sup>Trp</sup>CCA greatly rescued its substrate activity for  
494 Mod5 *in vivo* [17]. Presumably, the bulky cmnm<sup>5</sup> modification of U34 on *S. cerevisiae* mt-  
495 tRNA<sup>Trp</sup>UCA [85] may enhance binding in a pocket that otherwise better accommodates G or A [44]  
496 as compared to unmodified U or C [17]. Similarly, the 5-taurinomethyl modification of U34 (tm<sup>5</sup>U)  
497 on mammalian mt-tRNA<sup>Trp</sup>UCA [12] may also enhance binding to TRIT1. Likewise, bulky  
498 modifications to U34 may also be important for other tRNAs that carry a pyrimidine at 35, such as *S.*  
499 *cerevisiae* suppressor-cy-tRNA<sup>Trp</sup>UAA and the mcm<sup>5</sup>U34 found on the *S. pombe* suppressor-cy-  
500 tRNA<sup>Ser</sup>UCA [86] used in our TMS assay, as it is a substrate for i6A37 modification even when  
501 TRIT1 is expressed from the weak *nmt1*<sup>+</sup> promoter in pRep82X (Fig 3A), and mcmU34 on  
502 mammalian cy-tRNA<sup>Ser[Sec]</sup>UCA [87].

503 Examination of the cocrystal structure of Mod5-tRNA<sup>Cys</sup>GCA and sequence alignment of IPTases  
504 reveals that all of the four key side chains that contribute to the tRNA G34 binding pocket of Mod 5  
505 are varied among the *S. pombe*, *S. cerevisiae* and human IPTases (Supp. Fig S2). Of these, K127 of  
506 Mod5 may be most significant as its side chain makes purine-specific contact (<3Å) with the

507 tRNA<sup>Cys</sup>GCA G34 [44]; the homologous position residues are D in *S. pombe* Tit1 and Q in TRIT1  
508 (Supp. Fig S2A, B; see spTit1, HsTRIT1 and scMod5p). This would be consistent with the general  
509 pattern that Tit1 is the most divergent of the three IPTases and most efficient for tRNA<sup>Trp</sup>CCA  
510 modification. K127 resides in the anticodon binding loop of Mod5p (F120-E130, colored white in  
511 Supp Fig 3A) and the sequence alignment reveals that this is one of the diverged regions among the  
512 IPTases (underlined blue in Supp Fig 2B). The cumulative data suggest that different IPTases may  
513 exhibit differences in substrate preferences based on anticodon recognition and may have coevolved  
514 with their corresponding patterns of i6A37-tRNAs. Based on these observations and the pattern of  
515 sequences within the blue rectangle of Supp Fig 2B, it would be interesting to systematically test  
516 representative IPTases for relative activity toward a panel of different tRNA<sup>NNA</sup> substrates bearing  
517 A36-A37-A38.

518 Data and observations in this report lead to a model in which eukaryotic IPTases vary widely in  
519 ability to efficiently modify tRNA substrates with the A36-A37-A38 element and pyrimidines at  
520 positions 34 and 35. This appears most severe for TRIT1 and the cy-tRNA<sup>Trp</sup>CCA. Cumulative data  
521 and observations suggest that modifications to the wobble base can impact those IPTases that are  
522 sensitive to such substrates, and that bulky modifications to the mt-tRNA<sup>Trp</sup>UCA U34 can offset the  
523 negative impact of the pyrimidine in this context.

524

525 **Cytosolic versus mitochondrial requirements for IPTase activity.** The patterns of i6A37 on mt-  
526 tRNAs and cy-tRNAs differ strikingly among *S. pombe*, *S. cerevisiae*, and human (Table 1). In the  
527 cytoplasm these species' cy-tRNAs-i6A37 decode 7, 8 and 5 codons respectively, most limited in  
528 human to cy-tRNA<sup>Ser</sup>NGA and cy-tRNA<sup>Ser</sup>[Sec]UCA (Table 1). In addition to differences between yeast  
529 and human in numbers of cy- and mt- tRNAs-i6A37, they also differ in that human mt-tRNAs  
530 contain ms2i6A37 whereas yeast mt-tRNAs contain i6A37 (Table 1) [12-14].

531 There are multiple notable points regarding the relative numbers of codons cognate to tRNA-  
532 i6A37. This number is greater in human mitochondria than in human cytoplasm (13 vs. 5, Table 1).

533 Second, the reverse is true for the yeasts (Table 1). Perhaps relevant to this we note that whereas  
534 deletion of *S. cerevisiae* Mod5 does not cause a detectable mitochondrial phenotype, and deletion of  
535 *S. pombe* Tit1 leads to a metabolic phenotype that can be largely rescued by overexpression of cy-  
536 tRNA<sup>Tyr</sup>GUA [14], a relatively moderate loss of TRIT1 activity due to a point mutation that likely  
537 impairs tRNA-binding, has substantial negative impact on mitochondrial translation and function  
538 [41]. The data in Table 1 are consistent with the idea that the human mitochondrial translation  
539 system is more sensitive to loss of IPTase activity than the cytoplasmic translation system, and that  
540 this may be due to the relative cognate codon load as well as the relative dependency on ms2i6A37.

541

## 542 **MATERIALS AND METHODS**

543 **Yeast transformation** was by standard methods. A colony of the desired strain, yYH1, yNB5, was  
544 picked and inoculated in 10 mL of YES broth (yeast extract 5 g/L, dextrose 30 g/L, adenine 0.05  
545 g/L, L-histidine 0.05 g/L, L-leucine 0.05 g/L, L-lysine HCl 0.05 g/L, uracil 0.05 g/L) and grown  
546 overnight at 32°C with shaking (250 rpm). The culture was diluted to an OD<sub>600</sub> of 0.1-0.2 in fresh  
547 YES media and then grown to an OD<sub>600</sub> of 0.45-0.5. For each transformation, 10 mL of the culture  
548 was pelleted at 3,000 rpm for 5 min., the media decanted and the cells were washed with 40 ml of  
549 deionized water. Cells were resuspended in deionized water and pelleted at 8,000 rpm for 1 min in a  
550 1.5 mL microcentrifuge tube. Residual water was removed and cells were resuspended in 1/100<sup>th</sup> of  
551 the primary culture volume of freshly made TE-LiOAc (0.1 M LiOAc, 1X TE); aliquots of 100 uL  
552 were made for each transformation containing 5 uL of herring sperm DNA (Clontech, 10 mg/mL).  
553 1 ug of the desired plasmid DNA was added to each, followed by 700 uL of PEG-LiOAc (0.1 M  
554 LiOAc, 1X TE, PEG 8000 40% (w/v)) and vortexing. Reactions were heat shocked for 15 min at  
555 42°C then cells were pelleted at 8,000 rpm for 1 min. The supernatant was removed and cells  
556 resuspended in 1 ml of deionized water before spreading 200 uL on desired agar plate containing  
557 selective media using glass beads. Plates were incubated at 32°C in a convection incubator.

558

559 **DNA constructs.** The different TRIT1 mutants and wild-type for mammalian transfection (see  
560 Figure 1A) were cloned in the HindIII and AgeI sites of the pEGFP-N1 vector. A linker of 5 glycine  
561 residues was introduced between the TRIT1 sequences and GFP.

562 For yeast, Tit1 and Tit1-T12A, both with a C-terminal HA tag were expressed from the *tit1<sup>+</sup>*  
563 promoter in a pRep vector in which the *nmt1<sup>+</sup>* promoter had been excised [17]. TRIT1 and Mod5  
564 were expressed from the *nmt1<sup>+</sup>* promoters in pRep82X or 4X, cloned such that their ATG  
565 immediately followed the Xho I site. Mutants were made using site-directed mutagenesis or PCR. To  
566 create Mod5MTS-TRIT1, a DNA fragment corresponding to TRIT1(29-467) was PCR amplified  
567 using TRIT1 forward and reverse primers. TRIT129-467 Fwd: CTCGGGGCCACGGGCAC,  
568 TRIT1\_Rev: TTAAACGCTGCATTTTCAGCTC. The double stranded DNA sequence of Mod5MTS  
569 along with TRIT1 overhangs, **ATGCTAAAGGGACCGCTTAAAGGTTGCTTAAATATGTCT**  
570 **AAAAAAGTTATAGTGATTCTCGGGGCCACGGGCACC**, were obtained from Eurofins  
571 Genomics. The TRIT1 PCR fragment and the Mod5MTS DNA were annealed and reamplified using  
572 Mod5 MTS forward and TRIT1 reverse primers that included restriction sites; Xho1-Mod5 Fwd  
573 (ATTACTCGAGATGCTAAAGGGACCGCTTAAAGG) and Xma1-TRIT1 Rev  
574 (ATTACCCGGGTAAACGCTGCATTTTCAGCTC). The final product was digested with Xho1  
575 and Xma1, purified, and ligated into pRep4X and pRepP82X. The Mod5MTS-M12A-TRIT1  
576 construct was generated by site directed mutagenesis using the Q5® *Site-Directed Mutagenesis* kit  
577 (New England Biolabs) and Mod5MTS-TRIT1 and forward and reverse primers. All constructs were  
578 sequence verified.

579

580 **Cell culture.** HEK293 cells were maintained in DMEM plus Glutamax (Gibco) supplemented with  
581 10% heat-inactivated FBS in a humidified 37°C, 5% CO<sub>2</sub> incubator. HEK293 cells were transfected  
582 using Lipofectamine 2000 according to manufacturer's instructions using 1.5 ug of plasmid DNA

583 and 3 ul of lipofectamine 2000 to transfect cells that were 70% confluent in 6-well plates. 24-hour  
584 post transfection, cells were harvested and lysed for protein analysis on western blot or seeded onto  
585 coverslips for confocal microscopy the next day (see below).

586

587 **Western blots.** Total protein was extracted from transfected HEK293 cells lysed in RIPA buffer  
588 (Pierce) containing protease inhibitors (Roche) 24 hours post transfection and size separated using  
589 SDS-PAGE. Proteins were then transferred to a nitrocellulose membrane and subsequently analyzed  
590 using anti-GFP antibody (Santa Cruz, sc-8334). For protein isolation from *S. Pombe* cells were  
591 grown in EMM Ura-minus media. Anti-TRIT1 antibody was generated in rabbits using the peptide  
592 KLHPHDKRKVARSLQVFEE as an antigen and was affinity purified using the same peptide  
593 (Pierce protein research).

594 Western blots for yeast protein: *S. pombe* cells grown in liquid were transferred to a 1.5 mL  
595 microcentrifuge tube. An equal volume of 0.7 N NaOH solution was added, mixed, then incubated at  
596 room temperature for 3 minutes. The tube was centrifuged at 5,000 rpm for one min and the  
597 supernatant discarded. SDS-PAGE sample buffer was added, mixed well and the sample was heated  
598 at 95°C for 5 min centrifuged again and the resulting supernatant recovered for analysis. Proteins  
599 were then transferred to a nitrocellulose membrane and subsequently analyzed. Anti- $\beta$ -actin was  
600 from Abcam (mAbcam 8224) and used at a 1:5000 dilution. Quantifications were by the Odyssey  
601 CLx imaging system (LI-COR Biosciences) after calibration with quantification standards.

602

603 **Confocal microscopy.** 24 hrs after transfection cells were seeded onto coverslips. The next day the  
604 live cells were treated with MitoTracker (ThermoFisher) at 200 nM in PBS for 20 min. at 37°C.  
605 Cells were then fixed with 4% paraformaldehyde for 15 min. at room temperature and washed with  
606 PBS. PBS containing 1 ug/ml Hoechst 33342 (Sigma) was added and allowed to sit for 10 min,  
607 followed by a final PBS wash. Imaging was with a Leica DM IRE2 confocal microscope using a



608 HCX PL APO CS 63.0x1.32 oil UV objective. Images were scanned in sequential mode in Hoechst,  
609 GFP and MitoTracker channels.

610

611 **Northern blots** and the PHA6 assay were as described [64]. Briefly, after polyacrylamide-urea gel  
612 electrophoresis and transfer to GeneScreen plus, the blot is UV crosslinked and then baked in a  
613 vacuum oven at 80°C for 1-2 hrs prior to hybridization in buffer containing 2× SSC (1× SSC is 0.15  
614 M NaCl plus 0.015 M sodium citrate). The  $T_i$  (hybridization incubation temperature) is calculated  
615 as follows:  $T_i = T_m - 15^\circ\text{C}$  where  $T_m$  is equal to  $16.6 \log[M] + 0.41[P_{gc}] + 81.5 - P_m - (B/L) - 0.65$ ,  
616 where  $M$  is the molar salt concentration,  $P_{gc}$  is the percent G+C content in the oligonucleotide DNA  
617 probe,  $P_m$  is the percentage of mismatched bases, if any,  $B$  is 675, and  $L$  is the oligonucleotide DNA  
618 probe length [88]. Blot were washed with 2× SSC, 0.2% SDS two times at room temperature (10  
619 min each) followed by final 30 min. wash at  $T_i + 10^\circ\text{C}$  or  $+15^\circ\text{C}$  (determined empirically for each  
620 ACL probe). Before the next hybridization, blots were stripped with 0.1× SSC, 0.1% SDS at 85-  
621 95°C, and the nearly complete removal ( $\geq 90\%$ ) of  $^{32}\text{P}$  was confirmed by PhosphorImager analysis.  
622 Supplementary table S1 provides sequences of the oligo-DNAs used as ACL and body probes (BP)  
623 and their incubation temperatures ( $T_i$ ).

624 The formula used to calculate % A37 modification is  $[1 - (\text{ACL}tit1-\Delta(\text{transformed with Tit1 or}$   
625  $\text{TRIT1 constructs})/\text{BP}tit1-\Delta(\text{transformed with Tit1 or TRIT1 constructs})) / (\text{ACL}tit1-\Delta(\text{empty}$   
626  $\text{vector})/\text{BP}tit1-\Delta(\text{empty vector}))] \times 100$ , where % modification in yNB5 ( $tit1-\Delta$ ) = 0.

627

## 628 **ACKNOWLEDGEMENTS**

629 We thank Anup Dey (NICHD) for assistance with microscopy, Rima Sakhawala for technical  
630 assistance, and Tom Dever and Alan Hinnebusch for discussion.

631

632 **REFERENCES**

- 633 1. Sokolowski M, Klassen R, Bruch A, Schaffrath R, Glatt S. Cooperativity between different tRNA modifications  
634 and their modification pathways. *Biochim Biophys Acta*. 2017
- 635 2. Chatterjee K, Nostramo RT, Wan Y, Hopper AK. tRNA dynamics between the nucleus, cytoplasm and  
636 mitochondrial surface: Location, location, location. *Biochim Biophys Acta*. 2017
- 637 3. Vare VY, Eruysal ER, Narendran A, Sarachan KL, Agris PF. Chemical and Conformational Diversity of  
638 Modified Nucleosides Affects tRNA Structure and Function. *Biomolecules*. 2017;7(1)
- 639 4. Schweizer U, Bohleber S, Fradejas-Villar N. The modified base isopentenyladenosine and its derivatives in  
640 tRNA. *RNA biology*. 2017;1-12
- 641 5. Han L, Phizicky EM. A rationale for tRNA modification circuits in the anticodon loop. *RNA*. 2018
- 642 6. Guy MP, Shaw M, Weiner CL, Hobson L, Stark Z, Rose K, et al. Defects in tRNA Anticodon Loop 2'-*O*-  
643 Methylation Are Implicated in Nonsyndromic X-Linked Intellectual Disability due to Mutations in *FTSJ1*. *Hum*  
644 *Mutat*. 2015
- 645 7. Guy MP, Phizicky EM. Conservation of an intricate circuit for crucial modifications of the tRNA<sup>Phe</sup> anticodon  
646 loop in eukaryotes. *RNA*. 2014
- 647 8. Arimbasseri AG, Iben J, Wei FY, Rijal K, Tomizawa K, Hafner M, et al. Evolving specificity of tRNA 3-  
648 methyl-cytidine-32 (m<sup>3</sup>C32) modification: a subset of tRNAs<sup>Ser</sup> requires N<sup>6</sup>-isopentenylation of A37. *RNA*.  
649 2016;22(9):1400-10
- 650 9. Han L, Marcus E, D'Silva S, Phizicky EM. *S. cerevisiae* Trm140 has two recognition modes for 3-  
651 methylcytidine modification of the anticodon loop of tRNA substrates. *RNA*. 2016
- 652 10. Bohnsack MT, Sloan KE. The mitochondrial epitranscriptome: the roles of RNA modifications in mitochondrial  
653 translation and human disease. *Cell Mol Life Sci*. 2018;75(2):241-60
- 654 11. de Crecy-Lagard V, Boccaletto P, Mangleburg CG, Sharma P, Lowe TM, Leidel SA, et al. Matching tRNA  
655 modifications in humans to their known and predicted enzymes. *Nucleic Acids Res*. 2019;47(5):2143-59
- 656 12. Suzuki T, Suzuki T. A complete landscape of post-transcriptional modifications in mammalian mitochondrial  
657 tRNAs. *Nucleic Acids Res*. 2014;42(11):7346-57

- 658 13. Wei FY, Zhou B, Suzuki T, Miyata K, Ujihara Y, Horiguchi H, et al. Cdk5rap1-mediated 2-methylthio  
659 modification of mitochondrial tRNAs governs protein translation and contributes to myopathy in mice and humans.  
660 *Cell Metab.* 2015;21(3):428-42
- 661 14. Lamichhane TN, Arimbasseri AG, Rijal K, Iben JR, Wei FY, Tomizawa K, et al. Lack of tRNA-i6A  
662 modification causes mitochondrial-like metabolic deficiency in *S. pombe* by limiting activity of cytosolic tRNA<sup>Tyr</sup>,  
663 not mito-tRNA. *RNA.* 2016;22(4):583-96
- 664 15. Machnicka MA, Milanowska K, Osman Oglou O, Purta E, Kurkowska M, Olchowik A, et al. MODOMICS: a  
665 database of RNA modification pathways--2013 update. *Nucleic Acids Res.* 2013;41(Database issue):D262-7
- 666 16. Maraia RJ, Arimbasseri AG. Factors That Shape Eukaryotic tRNAsomes: Processing, Modification and  
667 Anticodon-Codon Use. *Biomolecules.* 2017;7(1)
- 668 17. Lamichhane TN, Blewett NH, Maraia RJ. Plasticity and diversity of tRNA anticodon determinants of substrate  
669 recognition by eukaryotic A37 isopentenyltransferases. *RNA.* 2011;17:1846-57
- 670 18. Maraia RJ, Iben JR. Different types of secondary information in the genetic code. *RNA.* 2014;20(7):977-84
- 671 19. Quax TE, Claassens NJ, Soll D, van der Oost J. Codon Bias as a Means to Fine-Tune Gene Expression. *Mol*  
672 *Cell.* 2015;59(2):149-61
- 673 20. Janner F, Vogeli G, Fluri R. The antisuppressor strain *sin1* of *Schizosaccharomyces pombe* lacks the  
674 modification isopentenyladenosine in transfer RNA. *J Mol Biol.* 1980;139(2):207-19
- 675 21. Laten HM. Antisuppression of class I suppressors in an isopentenylated-transfer RNA deficient mutant of  
676 *Saccharomyces cerevisiae*. *Curr Genet.* 1984;8(1):29-32
- 677 22. Dihanich ME, Najarian D, Clark R, Gillman EC, Martin NC, Hopper AK. Isolation and characterization of  
678 MOD5, a gene required for isopentenylation of cytoplasmic and mitochondrial tRNAs of *Saccharomyces cerevisiae*.  
679 *Mol Cell Biol.* 1987;7(1):177-84
- 680 23. Hopper AK, Schultz LD, Shapiro RA. Processing of intervening sequences: a new yeast mutant which fails to  
681 excise intervening sequences from precursor tRNAs. *Cell.* 1980;19(3):741-51
- 682 24. Willis I, Hottinger H, Pearson D, Chisholm V, Leupold U, Soll D. Mutations affecting excision of the intron  
683 from a eukaryotic dimeric tRNA precursor. *EMBO J.* 1984;3:1573-80

- 684 25. Kohli J, Munz P, Soll D. Informational suppression, transfer RNA, and intergenic conversion. In: Nasim A,  
685 Young P, Johnson BF, editors. *Molecular Biology of the Fission Yeast. Cell Biology*. San Diego: Academic Press,  
686 Inc.; 1989. p. 75-96.
- 687 26. Lopez-De-Leon A, Librizzi M, Puglia K, Willis IM. PCF4 encodes an RNA polymerase III transcription factor  
688 with homology to TFIIB. *Cell*. 1992;71(2):211-20
- 689 27. Sprague K. Transcription of eukaryotic tRNA genes. In: Soll D, RajBhandary UL, editors. *tRNA: Structure,*  
690 *Biosynthesis and Function*. Wash. D.C.: ASM Press; 1995. p. 31-50.
- 691 28. Boguta M, Czerska K, Zoladek T. Mutation in a new gene MAF1 affects tRNA suppressor efficiency in  
692 *Saccharomyces cerevisiae*. *Gene*. 1997;185(2):291-6
- 693 29. Zhao Z, Su W, Yuan S, Huang Y. Functional conservation of tRNase ZL among *Saccharomyces cerevisiae*,  
694 *Schizosaccharomyces pombe* and humans. *Biochem J*. 2009;422(3):483-92
- 695 30. Yukawa Y, Akama K, Noguchi K, Komiya M, Sugiura M. The context of transcription start site regions is  
696 crucial for transcription of a plant tRNA(Lys)(UUU) gene group both in vitro and in vivo. *Gene*. 2013;512(2):286-93
- 697 31. Arimbasseri AG, Blewett NH, Iben JR, Lamichhane TN, Cherkasova V, Hafner M, et al. RNA polymerase III  
698 output is functionally linked to tRNA dimethyl-G26 modification. *PLoS Genetics*.  
699 2015;doi:10.1371/journal.pgen.1005671
- 700 32. Rijal K, Maraia RJ, Arimbasseri AG. A methods review on use of nonsense suppression to study 3' end  
701 formation and other aspects of tRNA biogenesis. *Gene*. 2015;556(1):35-50
- 702 33. Spinola M, Galvan A, Pignatiello C, Conti B, Pastorino U, Nicander B, et al. Identification and functional  
703 characterization of the candidate tumor suppressor gene TRIT1 in human lung cancer. *Oncogene*. 2005;24:5502-9
- 704 34. Spinola M, Falvella FS, Galvan A, Pignatiello C, Leoni VP, Pastorino U, et al. Ethnic differences in frequencies  
705 of gene polymorphisms in the MYCL1 region and modulation of lung cancer patients' survival. *Lung Cancer*.  
706 2007;55(3):271-7
- 707 35. Yue Z, Li HT, Yang Y, Hussain S, Zheng CH, Xia J, et al. Identification of breast cancer candidate genes using  
708 gene co-expression and protein-protein interaction information. *Oncotarget*. 2016;7(24):36092-100
- 709 36. Chen S, Zheng Z, Tang J, Lin X, Wang X, Lin J. Association of polymorphisms and haplotype in the region of  
710 TRIT1, MYCL1 and MFSD2A with the risk and clinicopathological features of gastric cancer in a southeast Chinese  
711 population. *Carcinogenesis*. 2013;34(5):1018-24

- 712 37. Benko AL, Vaduva G, Martin NC, Hopper AK. Competition between a sterol biosynthetic enzyme and tRNA  
713 modification in addition to changes in the protein synthesis machinery causes altered nonsense suppression. Proc  
714 Natl Acad Sci U S A. 2000;97(1):61-6
- 715 38. Suzuki G, Shimazu N, Tanaka M. A yeast prion, Mod5, promotes acquired drug resistance and cell survival  
716 under environmental stress. Science. 2012;336(6079):355-9
- 717 39. Waller TJ, Read DF, Engelke DR, Smaldino PJ. The human tRNA-modifying protein, TRIT1, forms amyloid  
718 fibers in vitro. Gene. 2017;612:19-24
- 719 40. Golovko A, Sitbon F, Tillberg E, Nicander B. Identification of a tRNA isopentenyltransferase gene from  
720 *Arabidopsis thaliana*. Plant Mol Biol. 2002;49(2):161-9
- 721 41. Yarham JW, Lamichhane, T., Mattijssen, S., Bruni, F., McFarland, R., Maraia, R.J., Taylor, R.W. Defective  
722 i6A37 Modification of Mitochondrial and Cytosolic tRNAs Results from Pathogenic Mutations in TRIT1 and its  
723 Substrate tRNA. PLoS Genetics. 2014;Jun 5;10(6):e1004424
- 724 42. Lamichhane TN, Blewett NH, Cherkasova VA, Crawford AK, Iben JR, Farabaugh PJ, et al. Lack of tRNA  
725 modification isopentenyl-A37 alters mRNA decoding and causes metabolic deficiencies in fission yeast. Mol Cell  
726 Biol. 2013;33(PMID:23716598):2918-29
- 727 43. Soderberg T, Poulter CD. Escherichia coli dimethylallyl diphosphate:tRNA dimethylallyltransferase: site-  
728 directed mutagenesis of highly conserved residues. Biochemistry. 2001;40(6):1734-40
- 729 44. Zhou C, Huang RH. Crystallographic snapshots of eukaryotic dimethylallyltransferase acting on tRNA: insight  
730 into tRNA recognition and reaction mechanism. Proc Natl Acad Sci U S A. 2008;105(42):16142-7
- 731 45. Gillman EC, Slusher LB, Martin NC, Hopper AK. MOD5 translation initiation sites determine N6-  
732 isopentenyladenosine modification of mitochondrial and cytoplasmic tRNA. Mol Cell Biol. 1991;11(5):2382-90
- 733 46. Boguta M, Hunter LA, Shen WC, Gillman EC, Martin NC, Hopper AK. Subcellular locations of MOD5  
734 proteins: mapping of sequences sufficient for targeting to mitochondria and demonstration that mitochondrial and  
735 nuclear isoforms commingle in the cytosol. Mol Cell Biol. 1994;14(4):2298-306
- 736 47. Tolerico LH, Benko AL, Aris JP, Stanford DR, Martin NC, Hopper AK. *Saccharomyces cerevisiae* Mod5p-II  
737 contains sequences antagonistic for nuclear and cytosolic locations. Genetics. 1999;151(1):57-75
- 738 48. Pratt-Hyatt M, Pai DA, Haeusler RA, Wozniak GG, Good PD, Miller EL, et al. Mod5 protein binds to tRNA  
739 gene complexes and affects local transcriptional silencing. Proc Natl Acad Sci U S A. 2013;110(33):E3081-9

- 740 49. Smaldino PJ, Read DF, Pratt-Hyatt M, Hopper AK, Engelke DR. The cytoplasmic and nuclear populations of  
741 the eukaryote tRNA-isopentenyl transferase have distinct functions with implications in human cancer. *Gene*.  
742 2015;556(1):13-8
- 743 50. Bertrand E, Houser-Scott F, Kendall A, Singer RH, Engelke DR. Nucleolar localization of early tRNA  
744 processing. *Genes Dev*. 1998;12(16):2463-8
- 745 51. Thompson M, Haeusler RA, Good PD, Engelke DR. Nucleolar clustering of dispersed tRNA genes. *Science*.  
746 2003;302(5649):1399-401.
- 747 52. Kessler AC, d'Almeida GS, Alfonzo JD. The role of intracellular compartmentalization on tRNA processing  
748 and modification. *RNA biology*. 2017:0
- 749 53. Lemieux J, Lakowski B, Webb A, Meng Y, Ubach A, Bussiere F, et al. Regulation of physiological rates in  
750 *Caenorhabditis elegans* by a tRNA-modifying enzyme in the mitochondria. *Genetics*. 2001;159(1):147-57
- 751 54. Kernohan KD, Dymant DA, Pupavac M, Cramer Z, McBride A, Bernard G, et al. Matchmaking facilitates the  
752 diagnosis of an autosomal-recessive mitochondrial disease caused by biallelic mutation of the tRNA  
753 isopentenyltransferase (TRIT1) gene. *Hum Mutat*. 2017;38:511-6
- 754 55. Claros MG. MitoProt, a Macintosh application for studying mitochondrial proteins. *Comput Appl Biosci*.  
755 1995;11(4):441-7
- 756 56. Fukasawa Y, Tsuji J, Fu SC, Tomii K, Horton P, Imai K. MitoFates: improved prediction of mitochondrial  
757 targeting sequences and their cleavage sites. *Mol Cell Proteomics*. 2015;14(4):1113-26
- 758 57. Bannai H, Tamada Y, Maruyama O, Nakai K, Miyano S. Extensive feature detection of N-terminal protein  
759 sorting signals. *Bioinformatics (Oxford, England)*. 2002;18(2):298-305
- 760 58. Kosugi S, Hasebe M, Tomita M, Yanagawa H. Systematic identification of cell cycle-dependent yeast  
761 nucleocytoplasmic shuttling proteins by prediction of composite motifs. *Proc Natl Acad Sci U S A*.  
762 2009;106(25):10171-6
- 763 59. Martin NC, Hopper AK. How single genes provide tRNA processing enzymes to mitochondria, nuclei and the  
764 cytosol. *Biochimie*. 1994;76(12):1161-7
- 765 60. Murawski M, Szczesniak B, Zoladek T, Hopper AK, Martin NC, Boguta M. maf1 mutation alters the  
766 subcellular localization of the Mod5 protein in yeast. *Acta Biochim Pol*. 1994;41(4):441-8

- 767 61. Park JM, Intine RV, Maraia RJ. Mouse and Human La Proteins Differ in Kinase Substrate Activity and  
768 Activation Mechanism for tRNA Processing. *Gene Expression*. 2007;14:71-81
- 769 62. Basi G, Schmid E, Maundrell K. TATA box mutations in the *Schizosaccharomyces pombe* nmt1 promoter  
770 affect transcription efficiency but not the transcription start point or thiamine repressibility. *Gene*. 1993;123:131-6
- 771 63. Forsburg SL. Comparison of *Schizosaccharomyces pombe* expression systems. *Nucleic Acids Res*.  
772 1993;21(12):2955-6
- 773 64. Lamichhane TN, Mattijssen S, Maraia RJ. Human cells have a limited set of tRNA anticodon loop substrates of  
774 the tRNA isopentenyltransferase TRIT1 tumor suppressor. *Mol Cell Biol*. 2013;33:4900-8
- 775 65. Slusher LB, Gillman EC, Martin NC, Hopper AK. mRNA leader length and initiation codon context determine  
776 alternative AUG selection for the yeast gene MOD5. *Proc Natl Acad Sci U S A*. 1991;88(21):9789-93
- 777 66. Hinnebusch AG. Molecular mechanism of scanning and start codon selection in eukaryotes. *Microbiol Mol Biol*  
778 *Rev*. 2011;75(3):434-67, first page of table of contents
- 779 67. Zur H, Tuller T. New universal rules of eukaryotic translation initiation fidelity. *PLoS computational biology*.  
780 2013;9(7):e1003136
- 781 68. Li JM, Hopper AK, Martin NC. N2,N2-dimethylguanosine-specific tRNA methyltransferase contains both  
782 nuclear and mitochondrial targeting signals in *Saccharomyces cerevisiae*. *J Cell Biol*. 1989;109(4 Pt 1):1411-9
- 783 69. Ellis SR, Hopper AK, Martin NC. Amino-terminal extension generated from an upstream AUG codon increases  
784 the efficiency of mitochondrial import of yeast N2,N2-dimethylguanosine-specific tRNA methyltransferases. *Mol*  
785 *Cell Biol*. 1989;9(4):1611-20
- 786 70. Motorin Y, Bec G, Tewari R, Grosjean H. Transfer RNA recognition by the *Escherichia coli* delta2-  
787 isopentenyl-pyrophosphate:tRNA delta2-isopentenyl transferase: dependence on the anticodon arm structure. *RNA*.  
788 1997;3(7):721-33
- 789 71. Gefter ML, Russell RL. Role modifications in tyrosine transfer RNA: a modified base affecting ribosome  
790 binding. *J Mol Biol*. 1969;39(1):145-57
- 791 72. Bouadloun F, Srichaiyo T, Isaksson LA, Bjork GR. Influence of modification next to the anticodon in tRNA on  
792 codon context sensitivity of translational suppression and accuracy. *J Bacteriol*. 1986;166(3):1022-7
- 793 73. Jenner LB, Demeshkina N, Yusupova G, Yusupov M. Structural aspects of messenger RNA reading frame  
794 maintenance by the ribosome. *Nat Struct Mol Biol*. 2010;17(5):555-60

- 795 74. Chou HJ, Donnard E, Gustafsson HT, Garber M, Rando OJ. Transcriptome-wide Analysis of Roles for tRNA  
796 Modifications in Translational Regulation. *Mol Cell*. 2017;68(5):978-92 e4
- 797 75. Persson BC, Esberg B, Olafsson O, Bjork GR. Synthesis and function of isopentenyl adenosine derivatives in  
798 tRNA. *Biochimie*. 1994;76(12):1152-60
- 799 76. Bjork GR. Biosynthesis and Function of Modified Nucleosides. *tRNA: Structure, Biosynthesis and Function*.  
800 Wash., D.C.: ASM Press; 1995. p. 165-205.
- 801 77. Iben JR, Epstein JA, Bayfield MA, Bruinsma MW, Hasson S, Bacikova D, et al. Comparative whole genome  
802 sequencing reveals phenotypic tRNA gene duplication in spontaneous *Schizosaccharomyces pombe* La mutants.  
803 *Nucleic Acids Res*. 2011;39:4728-42
- 804 78. Iben JR, Maraia RJ. Yeast tRNAomics: tRNA gene copy number variation and codon use provide  
805 bioinformatics evidence of a new wobble pair in a eukaryote. *RNA*. 2012;18:1358-72
- 806 79. Iben JR, Maraia RJ. tRNA gene copy number variation in humans. *GENE*. 2014;536:376-84
- 807 80. Parisien M, Wang X, Pan T. Diversity of human tRNA genes from the 1000-genomes project. *RNA biology*.  
808 2013;10(12):1853-67
- 809 81. Chan PP, Lowe TM. GtRNAdb 2.0: an expanded database of transfer RNA genes identified in complete and  
810 draft genomes. *Nucleic Acids Res*. 2015;44(D1)(PMID:26673694 ):44(D1):D184-9
- 811 82. Marck C, Grosjean H. tRNomics: analysis of tRNA genes from 50 genomes of Eukarya, Archaea, and Bacteria  
812 reveals anticodon-sparing strategies and domain-specific features. *RNA*. 2002;8(10):1189-232
- 813 83. Novoa EM, Pavon-Eternod M, Pan T, Ribas de Pouplana L. A role for tRNA modifications in genome structure  
814 and codon usage. *Cell*. 2012;149(1):202-13
- 815 84. Machnicka MA, Olchowik A, Grosjean H, Bujnicki JM. Distribution and frequencies of post-transcriptional  
816 modifications in tRNAs. *RNA biology*. 2014;11(12):1619-29
- 817 85. Martin RP, Sibler AP, Gehrke CW, Kuo K, Edmonds CG, McCloskey JA, et al. 5-  
818 [[(carboxymethyl)amino]methyl]uridine is found in the anticodon of yeast mitochondrial tRNAs recognizing two-  
819 codon families ending in a purine. *Biochemistry*. 1990;29(4):956-9
- 820 86. Heyer WD, Thuriaux P, Kohli J, Ebert P, Kersten H, Gehrke C, et al. An antisuppressor mutation of  
821 *Schizosaccharomyces pombe* affects the post-transcriptional modification of the "wobble" base in the anticodon of  
822 tRNAs. *J Biol Chem*. 1984;259(5):2856-62



- 823 87. Chittum HS, Baek HJ, Diamond AM, Fernandez-Salguero P, Gonzalez F, Ohama T, et al. Selenocysteine  
824 tRNA[Ser]Sec levels and selenium-dependent glutathione peroxidase activity in mouse embryonic stem cells  
825 heterozygous for a targeted mutation in the tRNA[Ser]Sec gene. *Biochemistry*. 1997;36(28):8634-9
- 826 88. Leonard G. Davis MDDaJFB. *Basic Methods in Molecular Biology*: Elsevier; 1986. 388 p.
- 827 89. Hamilton R, Watanabe CK, de Boer HA. Compilation and comparison of the sequence context around the AUG  
828 startcodons in *Saccharomyces cerevisiae* mRNAs. *Nucleic Acids Res*. 1987;15(8):3581-93
- 829 90. Kozak M. An analysis of 5'-noncoding sequences from 699 vertebrate messenger RNAs. *Nucleic Acids Res*.  
830 1987;15(20):8125-48
- 831 91. Bullerwell CE, Leigh J, Forget L, Lang BF. A comparison of three fission yeast mitochondrial genomes.  
832 *Nucleic Acids Res*. 2003;31(2):759-68
- 833 92. McIlwain SJ, Peris D, Sardi M, Moskvina OV, Zhan F, Myers KS, et al. Genome Sequence and Analysis of a  
834 Stress-Tolerant, Wild-Derived Strain of *Saccharomyces cerevisiae* Used in Biofuels Research. *G3 (Bethesda)*.  
835 2016;6(6):1757-66
- 836 93. Sibler AP, Bordonne R, Dirheimer G, Martin R. [Primary structure of yeast mitochondrial tryptophan-tRNA  
837 capable of translating the termination U-G-A codon]. *C R Seances Acad Sci D*. 1980;290(11):695-8
- 838 94. Andrews RM, Kubacka I, Chinnery PF, Lightowlers RN, Turnbull DM, Howell N. Reanalysis and revision of  
839 the Cambridge reference sequence for human mitochondrial DNA. *Nat Genet*. 1999;23(2):147
- 840 95. Sprinzl M, Gauss DH. Compilation of tRNA sequences. *Nucleic Acids Res*. 1982;10(2):r1-55
- 841 96. Hamada M, Sakulich AL, Koduru SB, Maraia R. Transcription termination by RNA polymerase III in fission  
842 yeast: A genetic and biochemical model system. *J Biol Chem*. 2000;275:29076-81
- 843 97. Schon A, Bock A, Ott G, Sprinzl M, Soll D. The selenocysteine-inserting opal suppressor serine tRNA from *E*.  
844 *coli* is highly unusual in structure and modification. *Nucleic Acids Res*. 1989;17(18):7159-65
- 845 98. Bonitz SG, Berlani R, Coruzzi G, Li M, Macino G, Nobrega FG, et al. Codon recognition rules in yeast  
846 mitochondria. *Proc Natl Acad Sci U S A*. 1980;77(6):3167-70
- 847

848 **FIGURE LEGENDS**

849 **Figure 1. N-termini sequence alignment of representatives of phylogenetic groups of IPTases.**

850 Sequences of N-termini of IPTases. scMod5: *S. cerevisiae*; GRO-1: IPTase from *C. elegans*; spTit1:  
851 *S. pombe*; Sz = *S. octosporus*; dr: *D. rerio*; mus mus: *M. musculus*; canis fam: *C. familiaris* Hs: *H.*  
852 *sapiens*. The region necessary as a mitochondrial targeting sequence (MTS) of Mod5 is indicated  
853 [45]. The second methionine that may be used as alternative translation start sites for cytoplasmic  
854 localization are boxed in blue. The invariant Threonine within the conserved P-loop that functions in  
855 catalysis is in the yellow rectangle. Asterisks indicate the conserved DSMQ sequence that forms a  
856 network of contacts that mediate A37 recognition; the D of which in Mod5 acts as a general base for  
857 catalysis [44] and the M of which is M57 of TRIT1(57-467). As predicted by MitoFates [56], the  
858 TOM20-binding site of human TRIT1 is underlined with a blue bar and the amphipathic helices of  
859 TRIT1 and Mod5 are indicated with green bars. The two key basic residues in the amphipathic  
860 helices of the conserved mammalian MTSs that were mutated in human TRIT1 are in red rectangles.

861

862 **Figure 2. Human TRIT1 contains an N-terminal mitochondrial targeting sequence (MTS). A)**

863 Cartoon of the GFP-fusion constructs used. Numbering represents amino acids; black stripes indicate  
864 positions of two mutated residues in the R17E/R21E constructs. **B)** Representative confocal  
865 microscopic images from HEK293 cells transfected 48 hours prior with the constructs in A and  
866 stained with Hoechst and MitoTracker. Arrowheads in Merge panels point toward colocalized GFP  
867 and MitoTracker. **C)** Western blot from cells transfected with constructs in A) using anti-GFP

868

869 **Figure 3. Critical determinants of TRIT1 activity for cy-tRNA substrates. A)** cy-tRNA<sup>Ser</sup>UCA-

870 mediated suppression (TMS) assay of *S. pombe* IPTase-deleted strain yNB5 (*tit1*Δ) transformed with  
871 empty plasmid pRep82X or plasmids expressing the proteins indicated (see text), and the *tit1*<sup>+</sup>  
872 control strain, yYH1. **B)** Results of PHA6 assay (Methods) that shows relative i6A37 modification  
873 efficiency for *S. pombe* endogenous cy-tRNA<sup>Tyr</sup>GUA in transformed strains as indicated, calculated

874 as described in methods; error bars represent the spread in two replicates. **C)** TMS assay as in A but  
875 displayed as dilution spot assay, for plasmids expressing TRIT1 and variants from the weak  
876 (pRep82X) or strong (pRep4X) *nmt1*<sup>+</sup> promoter as indicated on the left. **D)** Western blot of extracts  
877 of the cells in C) detected with anti-Trit1 antibody (top panel), and anti-actin antibody (bottom).

878

879 **Figure 4. TRIT1 is specifically deficient for cy-tRNA<sup>Trp</sup>CCA modification.** **A)** i6A37-sensitive  
880 PHA6 northern blot assay for three tRNAs from *S. pombe* cells with pRep82X expression constructs  
881 indicated above the lanes. The blot was sequentially probed with i6A37-sensitive ACL probes to the  
882 cy-tRNAs indicated to the left of each panel. **B)** The body probes, to the T stem loop, for each of the  
883 cy-tRNA shown in A. **C)** Quantitation of % i6A37 modification of the three cy-tRNAs from  
884 biological duplicate PHA6 northern blots as for A & B; n =5 for cy-tRNA<sup>Trp</sup>CCA and all others  
885 except n=1 for cy-tRNA<sup>Tyr</sup> in Mod5 and Mod5M1A. **D)** Schematic showing constructs used for  
886 analysis of mt-tRNA<sup>Trp</sup>CCA i6A37 modification in *S. pombe*. Left: amino acid sequence depiction of  
887 N-termini only, similar to Fig 1; invariant Thr is demarcated by yellow rectangle. Alternative  
888 translation initiation sites are shown in red. Right: linear representation of the constructs with  
889 landmarks in the N-terminal regions indicated. **E)** The same blot as in panels A-B, probed for mt-  
890 tRNA<sup>Trp</sup>CCA using ACL and body probes as indicated. **F)** Quantitation of % i6A37 modification of  
891 mt-tRNA<sup>Trp</sup>CCA from biological duplicate PHA6 northern blots.

892

893 **Figure 5. TRIT1 MTS-dependent i6A37 modification of mt-tRNA<sup>Trp</sup>CCA and mt-tRNA<sup>Cys</sup>GCA.**  
894 **A-C)** Northern blot panels probed for mt-tRNA<sup>Trp</sup>CCA, mt-tRNA<sup>Cys</sup>GCA and cy-tRNA<sup>Tyr</sup>GUA with  
895 ACL and body probes as indicated; and **D)** EtBr panel. **E)** Quantitation of % i6A37 modification of  
896 the mt-tRNAs and the cy-tRNA from biological replicate PHA6 northern blots as indicated.

897

898 **Figure 6. Concentration-dependent i6A37 modification of cy-tRNA<sup>Trp</sup>CCA.** **A)** Translation  
899 initiation contexts of ATG codons; the first two lines show consensus derived for *S. cerevisiae*

900 [highly expressed genes 67, 89] and the last line shows a consensus derived for vertebrate [90].  
901 Lines 3 and 4 are for the alternative ATGs that encode MOD5 M1 and M12 in their native context;  
902 lines 5 and 6 are for the MOD5 M1 and TRIT1 M1 after cloning into the *XhoI* site of *S. pombe*  
903 expression vectors pRep4X or pRep82X (*pRepXhoI*). Line 7 shows the native TRIT1 M1 ATG  
904 context. **B)** Nucleotide sequence of MOD5 including its M1 and M12 ATG sites and the M12A  
905 substitution mutation in the Mod5MTS-M12A-TRIT1 construct. **C)** Western blot of TRIT1 protein  
906 developed using anti-TRIT1 Ab, from cells with constructs indicated above the lanes containing the  
907 strong (pRep4X) or weak (pRep82X) *nmt1*<sup>+</sup> promoter (see text). Lanes are numbered below. MW  
908 markers are indicated in kDa. The common band below 25 kDa is an internal control. Lower panel  
909 shows  $\beta$ -actin as loading control used for quantitative normalization. **D)** Determination of TRIT1  
910 levels in C by quantitative Odyssey CLx imaging (Methods); numbers above bars indicate TRIT1/ $\beta$ -  
911 actin levels in each sample. **E)** Northern blot of 2 cy- and 2 mt- tRNAs by TRIT1 and Mod5MTS-  
912 TRIT1 each from the strong promoter, pRep4X and weak promoter pRep82X, as indicated above the  
913 lanes. The top four panels show the ACL probings as indicated to the left, and the bottom four panels  
914 show the corresponding body probings. **F)** Quantitation of % i6A37 modification of the mt-tRNAs  
915 and the cy-tRNAs as indicated. **G)** Clover leaf representations of *S. pombe* cy-tRNA<sup>Trp</sup>CCA and mt-  
916 tRNA<sup>Trp</sup>CCA as encoded by the nuclear and mitochondrial DNA and folded by tRNAscan-SE [81]  
917 (Table 1, Discussion).

918

919 **Figure 7. Secondary structures of the cy- and mt- tRNAs<sup>Trp</sup>** as predicted by the tRNAscan-SE-folding  
920 algorithm for *S. pombe* (A, B), *S. cerevisiae* (D, E) and Bovine/Human (F, G). Known modifications, to the  
921 anticodon loop only, are annotated as blue text, as indicated; black annotated text indicates encoded nucleotide  
922 identity that differs among species [12] [15]. **C)** Sequence alignment of *S. pombe* mt- and cy- tRNAs<sup>Trp</sup>.

923

924 **Supplementary Figure S1. Optimizing the PHA6 assay for quantification.** **A)** PHA6 northern  
925 blot probed for mt-tRNA<sup>Trp</sup>CCA ACL then sequentially washed at increasing temperatures as

926 indicated. **B)** Quantitation of northern blots; % modification calculated as described in the materials  
927 and methods.

928

929 **Supplementary Figure S2.** **A)** Structure from PDBxxx from Zhou and Huang [44] showing  
930 anticodon nucleotide G34 (red) of tRNA<sup>Cys</sup>GCA in complex with Mod. Note stacking with H86 and  
931 base-specific contact with side chain of K127 (<4Å). **B)** Sequence alignment of IPTases; the red  
932 rectangles enclose amino acids in blue boxes (Mod5) mentioned in the text; the blue underline  
933 represents the variable anticodon recognition loop.

934

935 **Table 1**

| tRNA anticodon<br>(as set by encoding<br>DNA)     | <i>E. coli</i><br><i>MiaA</i>                  | <i>S. pombe</i><br><i>tit1</i> <sup>+</sup> | <i>S. cerevisiae</i><br><i>MOD5</i> | human or bovine<br><i>TRIT1</i>                |
|---------------------------------------------------|------------------------------------------------|---------------------------------------------|-------------------------------------|------------------------------------------------|
| cy-Ser GGA                                        | A <sub>37</sub>                                | –                                           | –                                   | –                                              |
| cy-Ser AGA                                        | –                                              | i <sup>6</sup> A <sub>37</sub>              | i <sup>6</sup> A <sub>37</sub>      | i <sup>6</sup> A <sub>37</sub>                 |
| cy-Ser CGA                                        | ms <sup>2</sup> i <sup>6</sup> A <sub>37</sub> | i <sup>6</sup> A <sub>37</sub>              | i <sup>6</sup> A <sub>37</sub>      | i <sup>6</sup> A <sub>37</sub>                 |
| cy-Ser UGA                                        | ms <sup>2</sup> i <sup>6</sup> A <sub>37</sub> | i <sup>6</sup> A <sub>37</sub>              | i <sup>6</sup> A <sub>37</sub>      | i <sup>6</sup> A <sub>37</sub>                 |
| cy-Ser <sup>Sec</sup> UCA                         | i <sup>6</sup> A <sub>37</sub>                 | –                                           | –                                   | i <sup>6</sup> A <sub>37</sub>                 |
| cy-Tyr GUA                                        | ms <sup>2</sup> i <sup>6</sup> A <sub>37</sub> | i <sup>6</sup> A <sub>37</sub>              | i <sup>6</sup> A <sub>37</sub>      | m <sup>1</sup> G <sub>37</sub>                 |
| cy-Cys GCA                                        | ms <sup>2</sup> i <sup>6</sup> A <sub>37</sub> | G                                           | i <sup>6</sup> A <sub>37</sub>      | m <sup>1</sup> G <sub>37</sub>                 |
| cy-Trp CCA                                        | ms <sup>2</sup> i <sup>6</sup> A <sub>37</sub> | i <sup>6</sup> A <sub>37</sub>              | A <sub>37</sub>                     | m <sup>1</sup> G <sub>37</sub>                 |
| cy-Phe GAA                                        | ms <sup>2</sup> i <sup>6</sup> A <sub>37</sub> | yW <sub>37</sub>                            | yW <sub>37</sub>                    | yW <sub>37</sub>                               |
| cy-Leu CAA                                        | ms <sup>2</sup> i <sup>6</sup> A <sub>37</sub> | G                                           | m <sup>1</sup> G <sub>37</sub>      | m <sup>1</sup> G <sub>37</sub>                 |
| cy-Leu UAA                                        | ms <sup>2</sup> i <sup>6</sup> A <sub>37</sub> | G                                           | m <sup>1</sup> G <sub>37</sub>      | m <sup>1</sup> G <sub>37</sub>                 |
| <b># of i<sup>6</sup>A cy-<br/>cognate codons</b> | <b>12</b>                                      | <b>7</b>                                    | <b>8</b>                            | <b>5</b>                                       |
| mt-Trp CCA <sup>#</sup>                           |                                                | i <sup>6</sup> A <sub>37</sub>              | –                                   | –                                              |
| mt-Trp UCA <sup>#</sup>                           |                                                | –                                           | i <sup>6</sup> A <sub>37</sub>      | ms <sup>2</sup> i <sup>6</sup> A <sub>37</sub> |
| mt-Tyr GUA                                        |                                                | G                                           | i <sup>6</sup> A <sub>37</sub>      | ms <sup>2</sup> i <sup>6</sup> A <sub>37</sub> |
| mt-Ser UGA                                        |                                                | G                                           | m <sup>1</sup> G <sub>37</sub>      | ms <sup>2</sup> i <sup>6</sup> A <sub>37</sub> |
| mt-Phe GAA                                        |                                                | G                                           | m <sup>1</sup> G <sub>37</sub>      | ms <sup>2</sup> i <sup>6</sup> A <sub>37</sub> |
| mt-Cys GCA                                        |                                                | i <sup>6</sup> A <sub>37</sub>              | i <sup>6</sup> A <sub>37</sub>      | i <sup>6</sup> A <sub>37</sub>                 |
| mt-Leu UAA                                        |                                                | A <sup>*</sup>                              | m <sup>1</sup> G <sub>37</sub>      | A <sup>*</sup>                                 |
| <b># of i<sup>6</sup>A mt-<br/>cognate codons</b> |                                                | <b>4</b>                                    | <b>6</b>                            | <b>13</b>                                      |

936 <sup>#</sup>Position 34 of *S. pombe* mt-tRNA<sup>Trp</sup> is encoded as C [91] whereas in *S. cerevisiae* [92, 93], bovine and human  
 937 [94], it is encoded to be U, and was determined to be 5-taurinomethyluridine (tm<sup>5</sup>U) in bovine [12], and  
 938 cmnm<sup>5</sup>U in *S. cerevisiae* [85] (see tRNAmoViz server [84]). All entries with subscript <sub>37</sub> have been verified

939 as modified or unmodified; entries without <sub>37</sub> show encoded nucleotide but have not been validated [12, 17, 42,  
 940 64]. *S. cerevisiae* mt-tRNA<sup>Trp</sup> i6A37 was reported in [95]. \* A is not in an A36-A37-A38 context. yW:  
 941 ybutosine; dash “-” indicates there is no gene for a tRNA with this anticodon [81]. *Sup-3e* [25] (encodes cy-  
 942 tRNA<sup>Ser</sup>UCA, also referred to as pSer tRNA [32, 96]) contains mcm<sup>5</sup>U [86] as does mammalian selenocysteine-  
 943 inserting cy-tRNA<sup>Ser[Sec]</sup>UCA [87]. See *E. coli* tRNA<sup>Ser[Sec]</sup>UCA [97]. The mt-tRNAs<sup>Trp</sup> recognize 2 sense codons  
 944 in yeast and animal mitochondria [98] [12].

945

946 **Table 2.** Oligo-DNAs used for PHA6 assay; ACL (anticodon loop), BP (body probe).

947

| Probe name         | sequence 5' → 3'            | T <sub>m</sub>      |
|--------------------|-----------------------------|---------------------|
| mt-tRNA-TrpCCA ACL | CAATGTCTAATTTGGAATCAGAAGT   | 43.9                |
| mt-tRNA-TrpCCA BP  | GAGCAGTCCGACTTGAACGAACAAT   | 50.5 <sup>949</sup> |
| cy-tRNA-SerAGA ACL | CGCAACAGATTTCTAGTCTGTCCCT   | 50.5 <sup>950</sup> |
| cy-tRNA-SerAGA BP  | CACCAGCAGGATTTGAACCTGCGC    | 53.6                |
| cy-tRNA-TyrGUA ACL | ACCAACCGGTTTACAGCCGGGTGT    | 53.6 <sup>951</sup> |
| cy-tRNA-TyrGUA BP  | CCTGAGCCAGAATCGAACTAGCG     | 51.6 <sup>952</sup> |
| cy-tRNA-TrpCCA ACL | CTTTGAGATTTGGAATCTCACAC     | 44.5                |
| cy-tRNA-TrpCCA BP  | ACCCCTAAGTGACTTGAACAC       | 45.4 <sup>953</sup> |
| cy-tRNA-cysGCA ACL | TCAAATTTTGCAAATTC AATTTTCAG | 40.7 <sup>954</sup> |
| cy-tRNA-cysGCA BP  | TAATGATGAGAATTGAACTCATA     | 39.2                |
| mt-tRNA-cysGCA ACL | TCAAATTTTGCAAATTC AATTTTCAG | 40.7 <sup>955</sup> |
| mt-tRNA-cysGCA BP  | TAATGATGAGAATTGAACTCATA     | 39.2 <sup>956</sup> |

957 **Table 3.** PCR Primers used in this study

| Name                | Sequence 5'-3'                           |
|---------------------|------------------------------------------|
| TRIT1_Fwd           | ATTACTCGAGATG GCG TCC GTG GCG GCT        |
| TRIT1_Rev           | ATATGGATCCTTAAACGCTGCATTTTCAGCTCTTG      |
| TRIT129-467_F       | CTCGGGGCCACGGGCAC                        |
| Xma1-TRIT1_R        | ATTACCCGGTTAAACGCTGCATTTTCAGCTC          |
| Xho1Mod5MTS_F       | ATTACTCGAGATGCTAAAGGGACCGCTTAAAGG        |
| Mod5MTSM12A-TRIT1_F | TTGCTTAAATgctTCTAAAAAAGTTATAGTGATTCTCGGG |
| Mod5MTSM12A-TRIT1_R | CCTTTAAGCGGTCCCTTTAG                     |

958

Figure 1, Khaliq et al

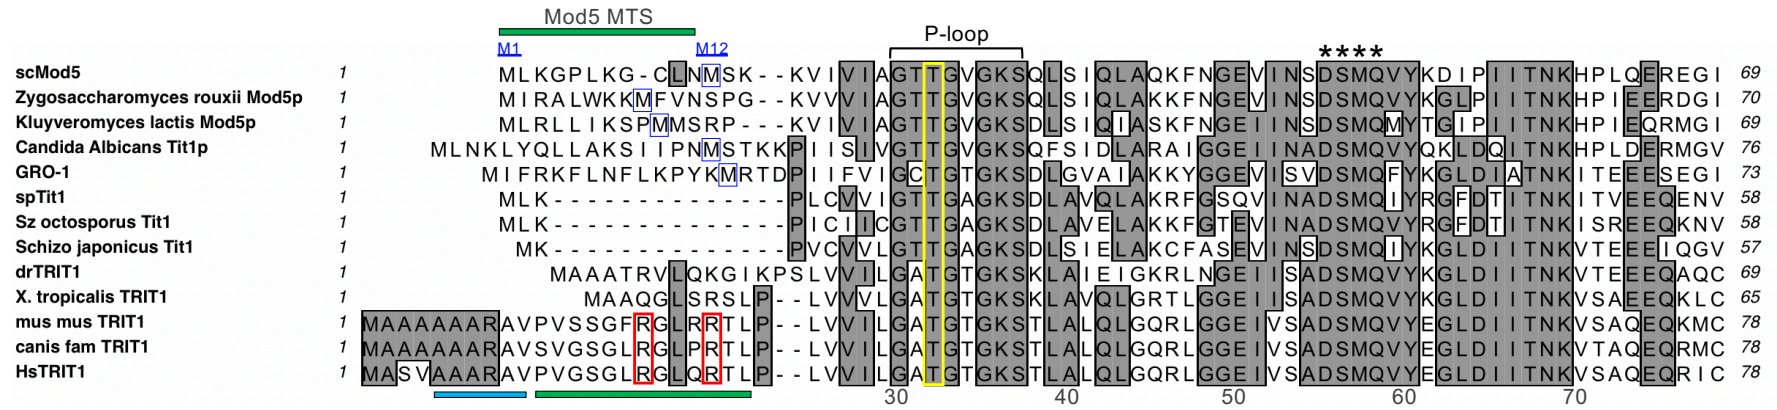



Figure 2, Khaliq et al

A)

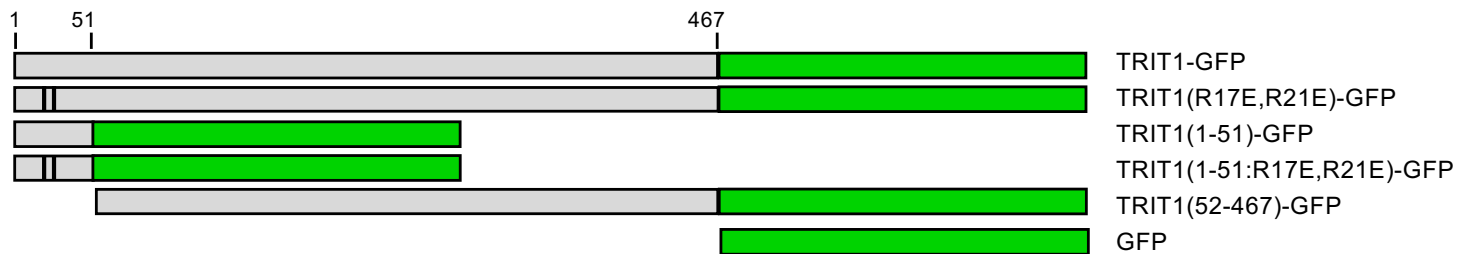

B)

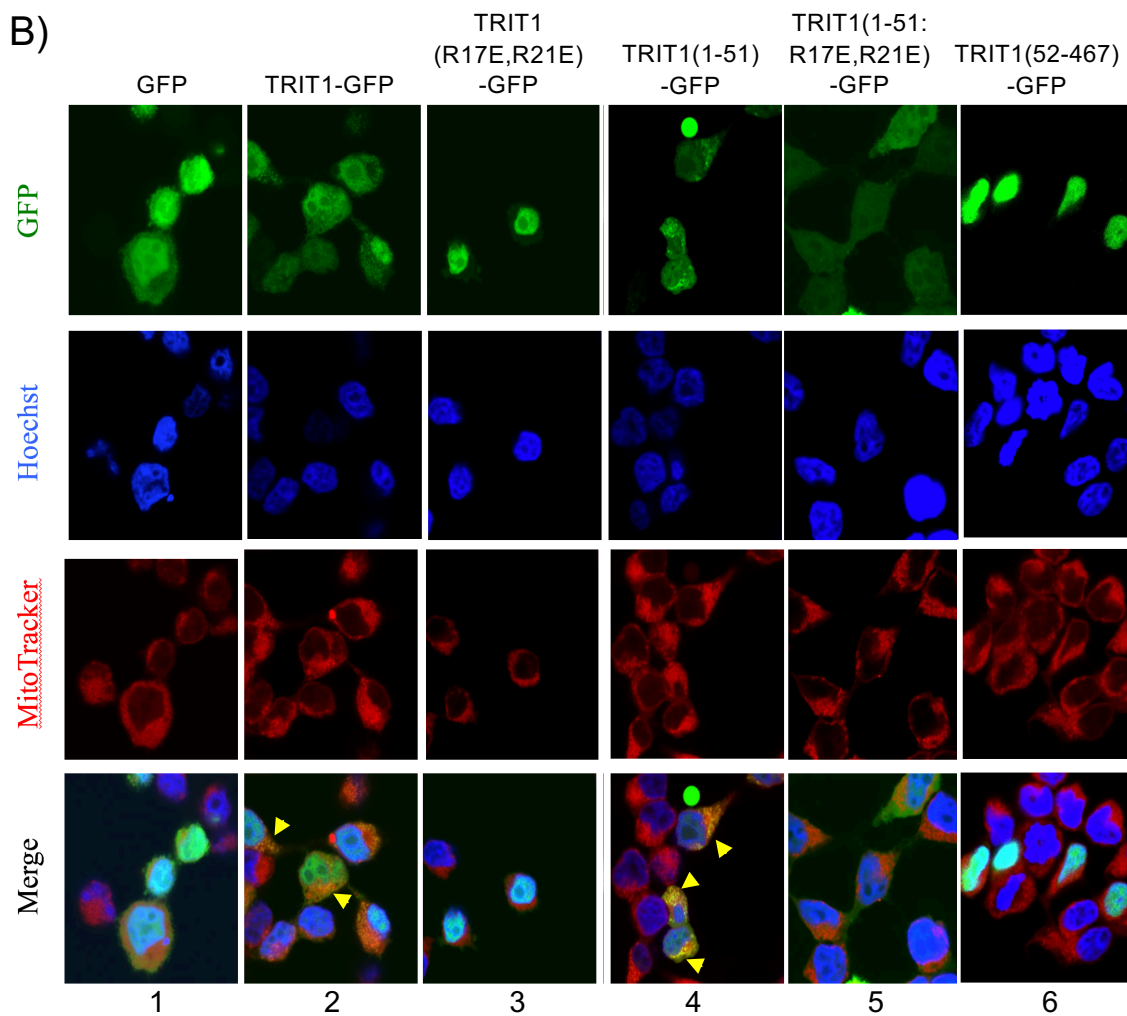

C)

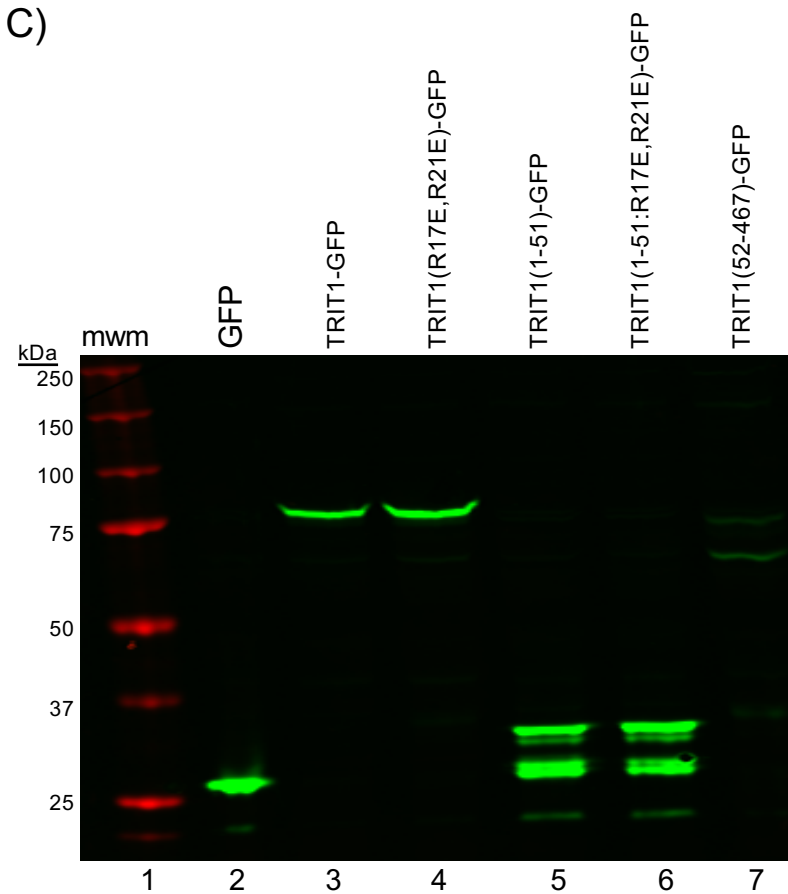

Figure 3, Khaliq et al.

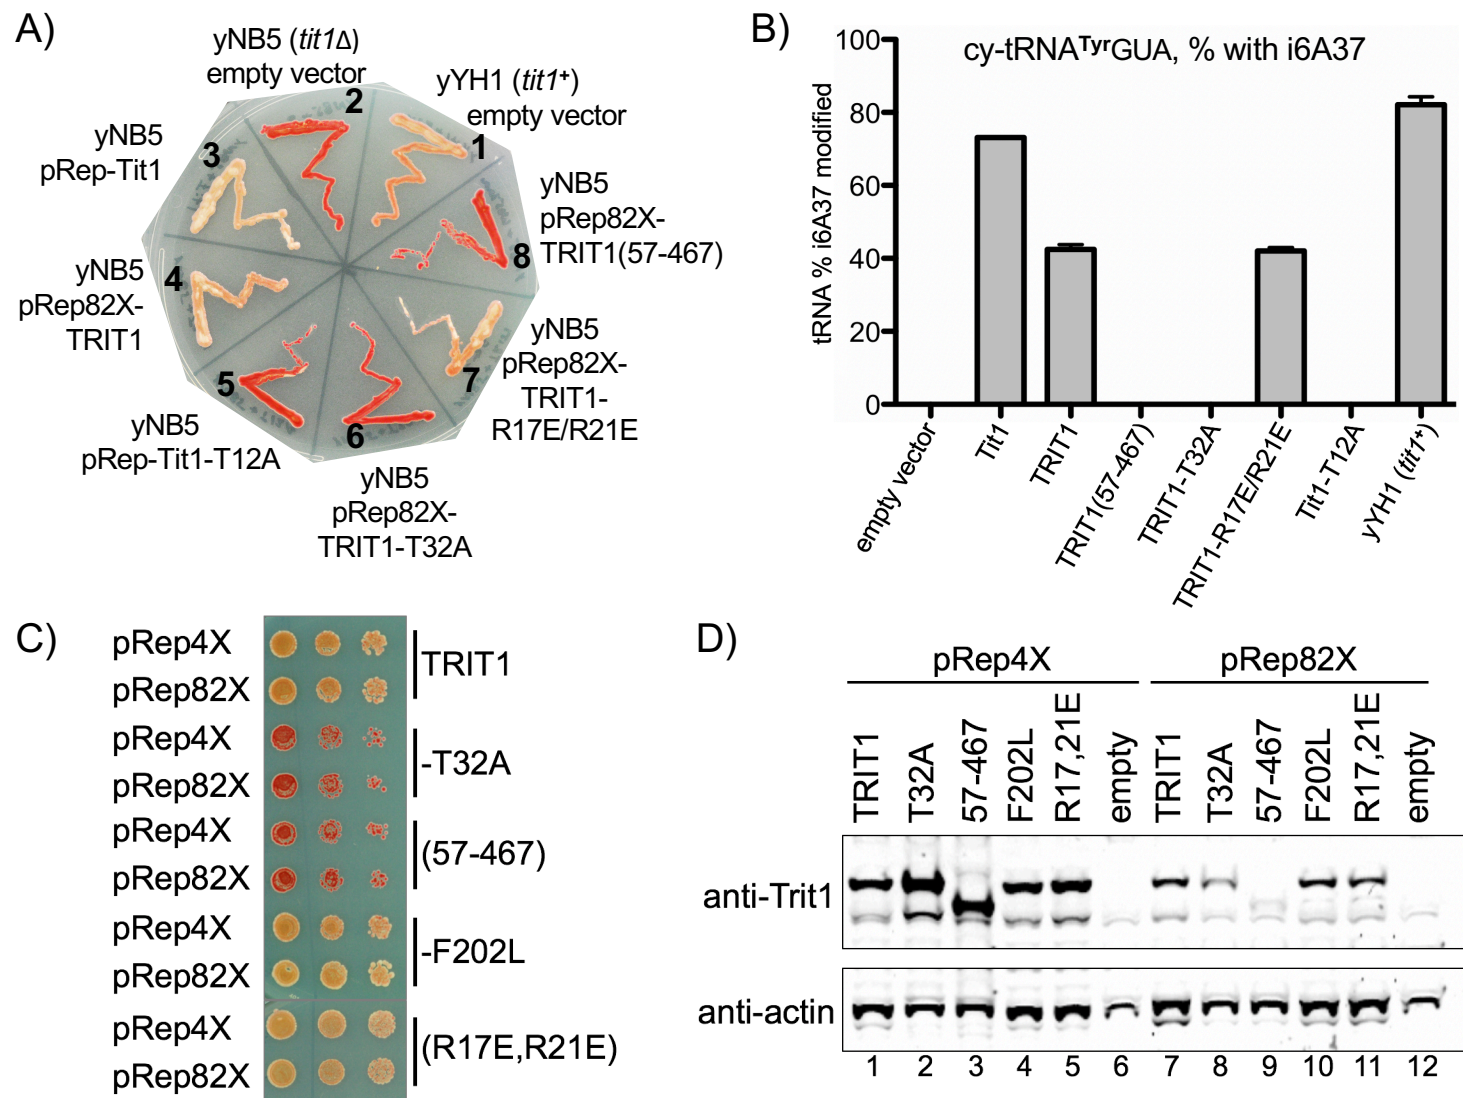

Figure 4, Khaliq et al

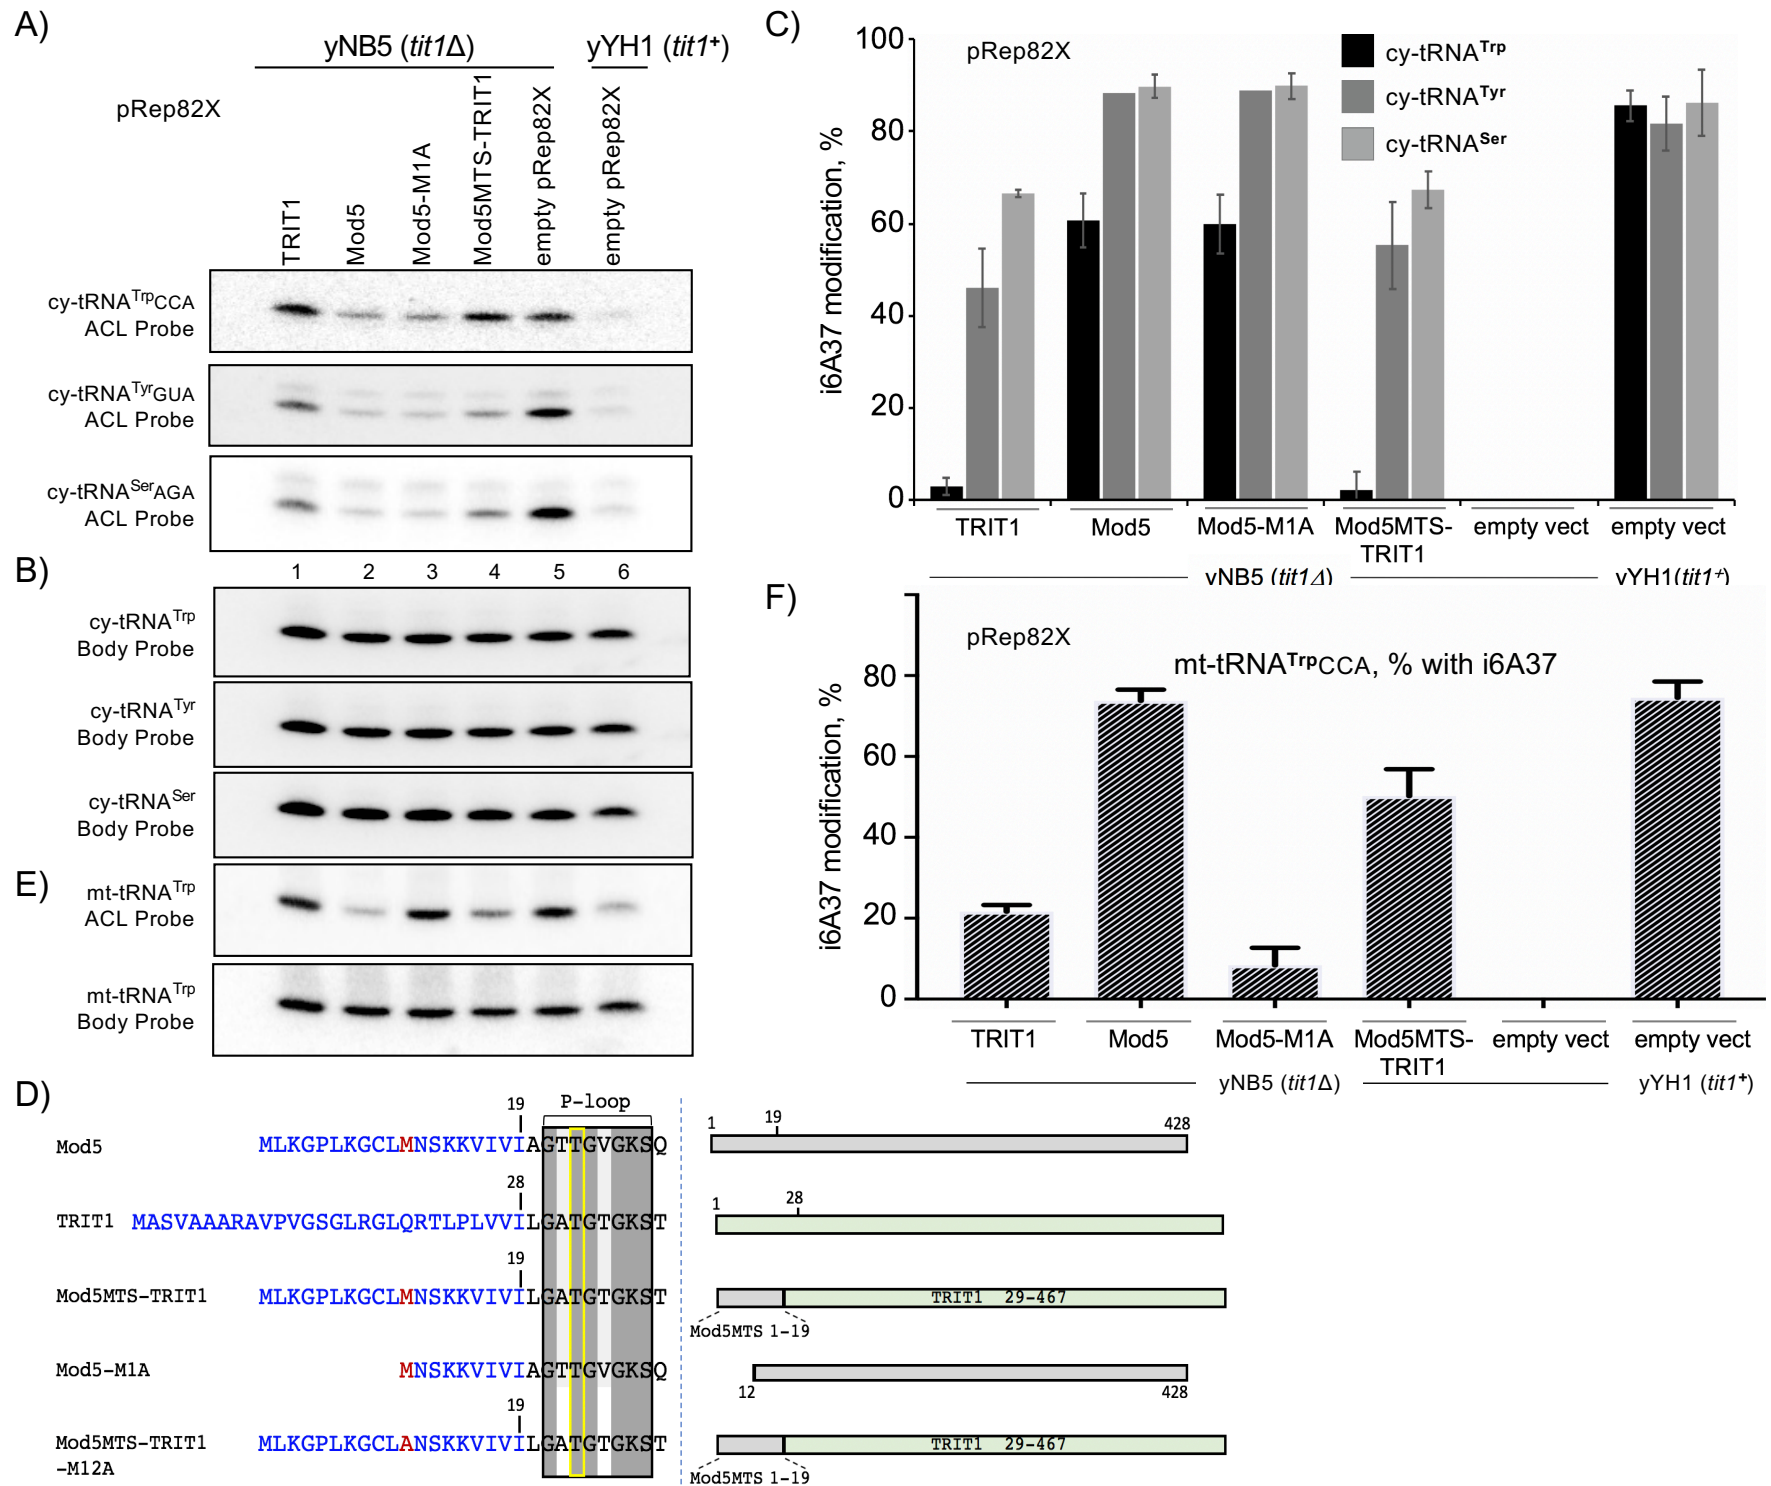

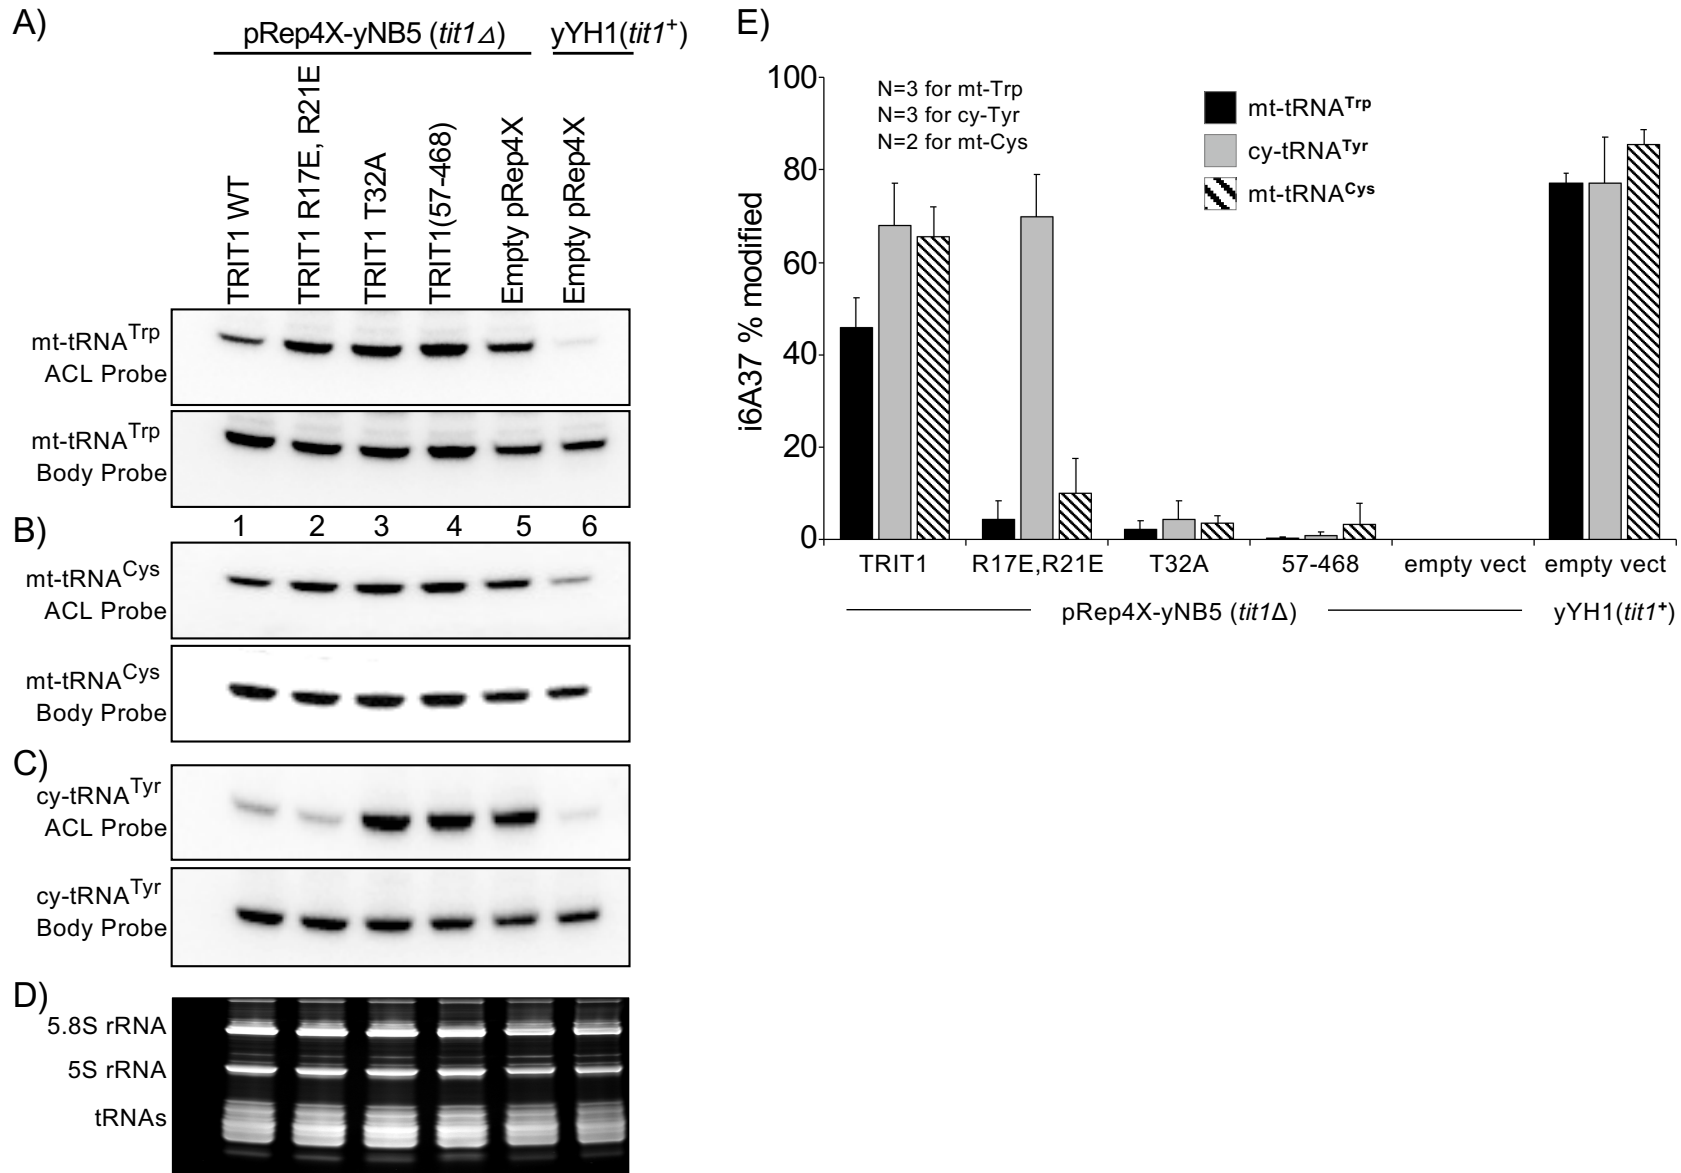

Figure 6, Khalique et al TRIT1 concentration-dependent modification of the inferior substrate, cy-tRNA<sup>Trp</sup>CCA.

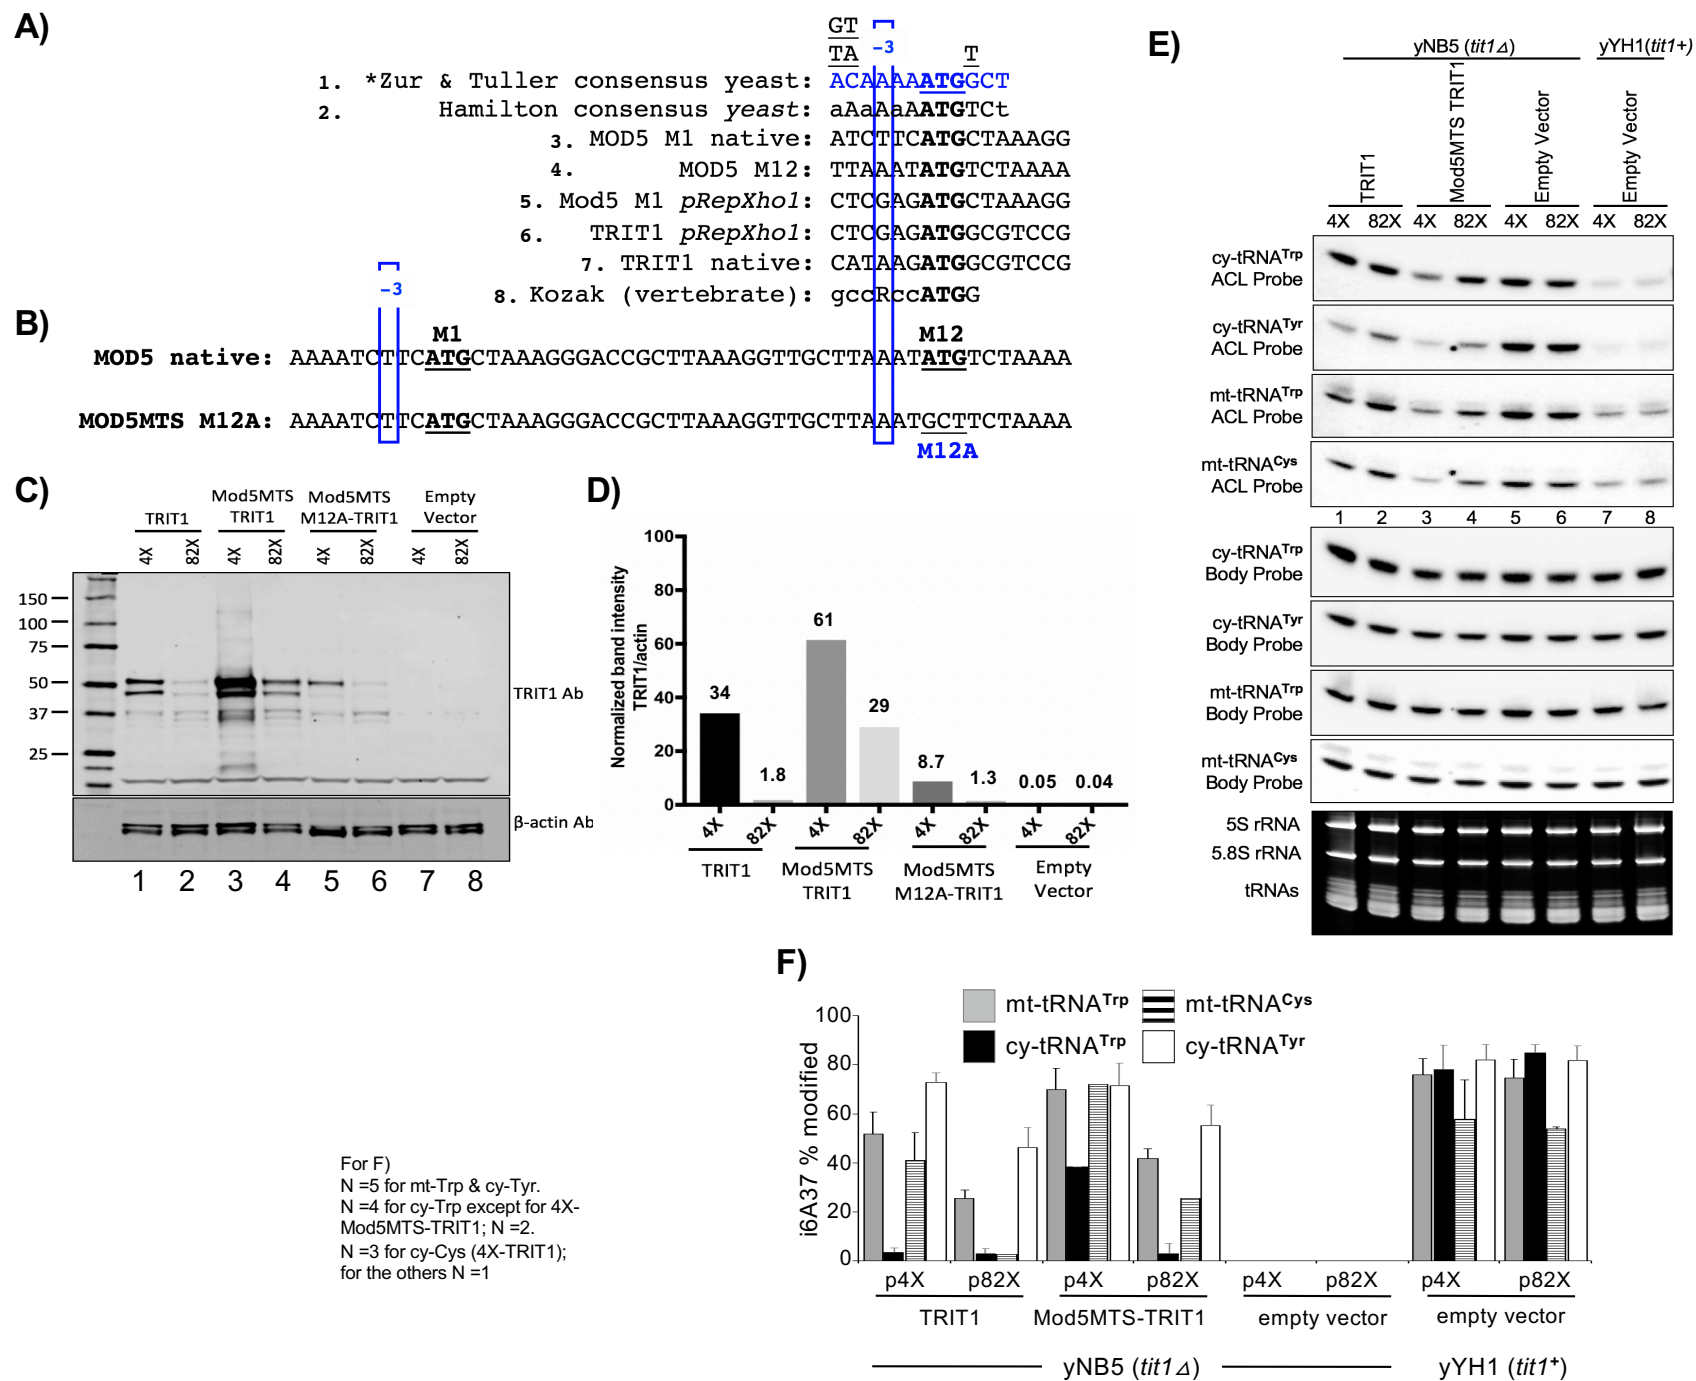

Figure 7, Khalique et al

A) *S. pombe* cy-tRNA<sup>Trp</sup>PCCA

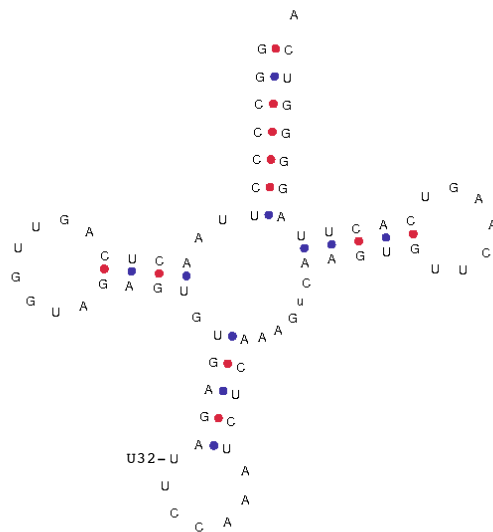

D) *S. cerevisiae* cy-tRNA<sup>Trp</sup>PCCA

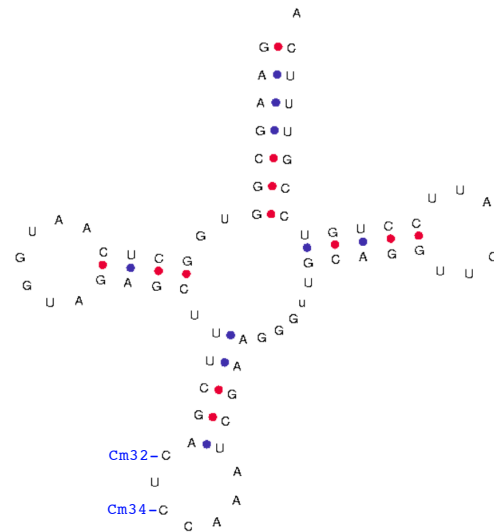

F) *Bovine/human* cy-tRNA<sup>Trp</sup>PCCA

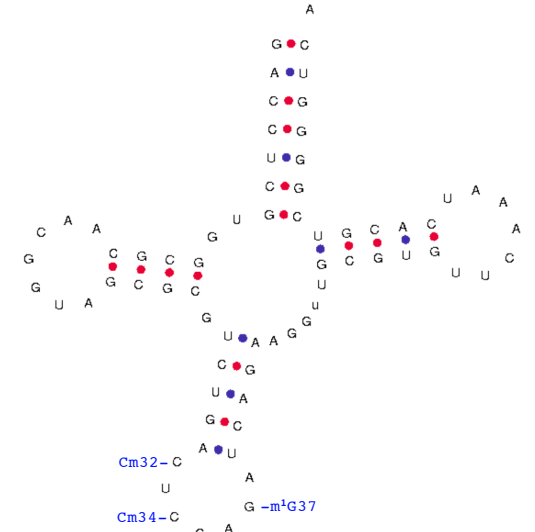

B) *S. pombe* mt-tRNA<sup>Trp</sup>PCCA

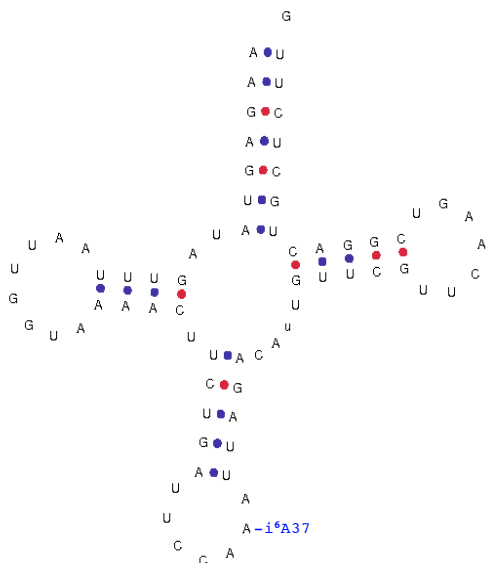

E) *S. cerevisiae* mt-tRNA<sup>Trp</sup>UCA

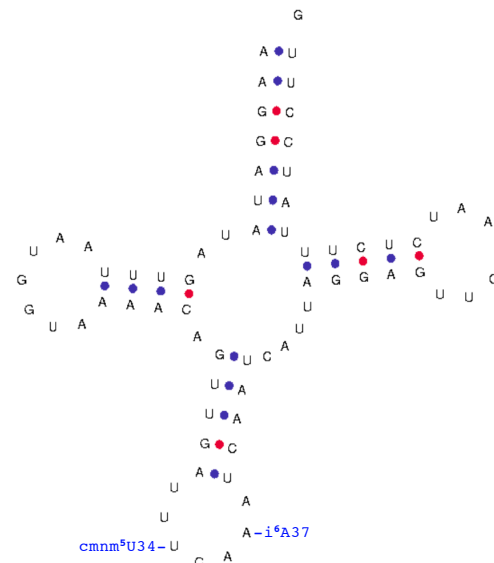

G) *Bovine/human* mt-tRNA<sup>Trp</sup>UCA

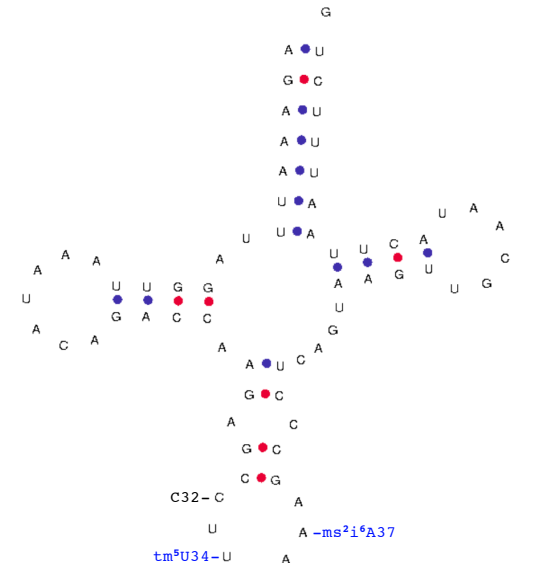

C)

10                      20                      30                      40                      50                      60                      70

**sp mt tTrp** AAGAGTATAGTTTAAATTGGTAAAAGCTTCTGATTCCAAAT-TAGACATTGTTTCGTTCAAGTCGGACTGCTCTTG  
**sp cy tTrp** GCCCCCTTAACTCAGTTGGTAGAGTGTGAGATTCCAAATCTCAAAGTCAAGTGTTCAAGTCACTTAGGGGTCA

SUPPLEMENTARY DATA FIG S1, Khalique et al.

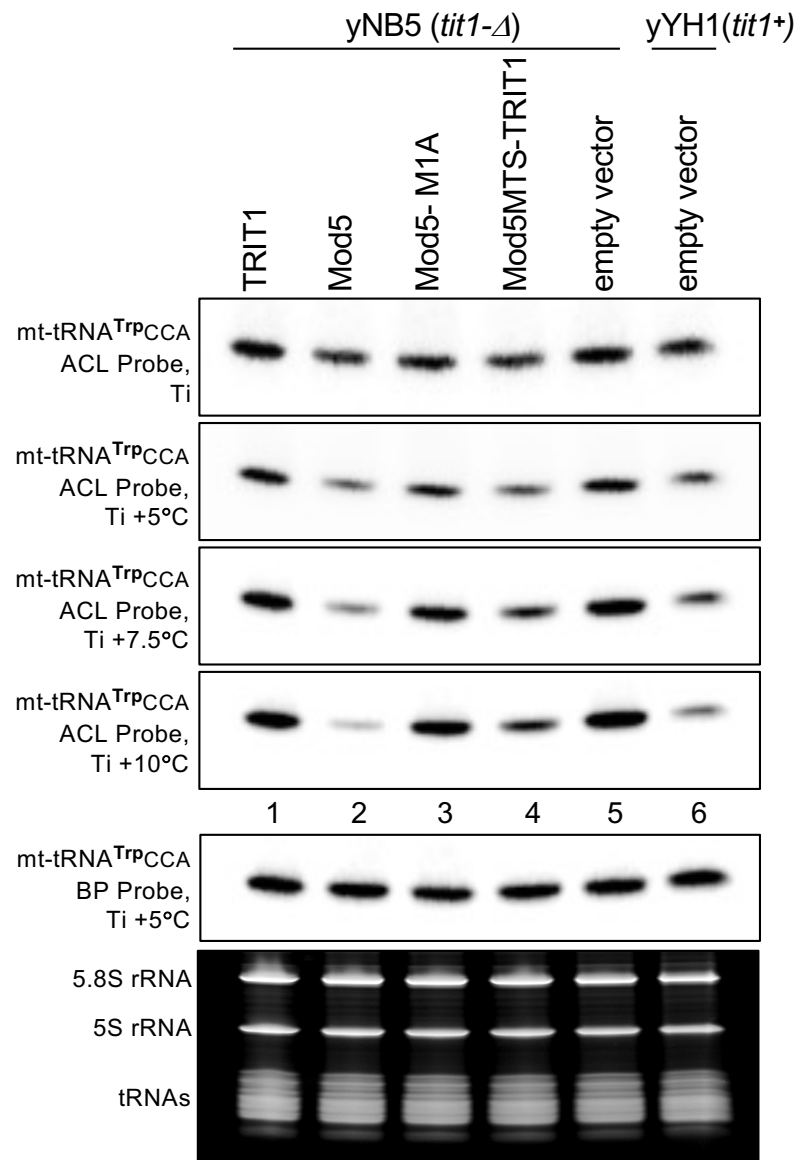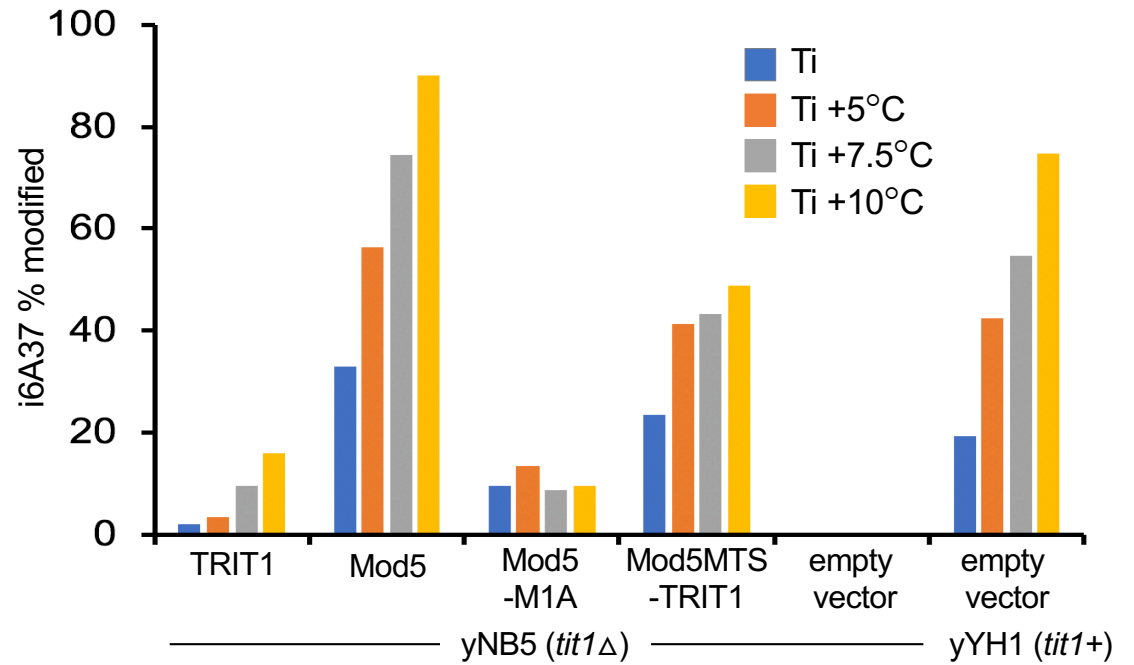

SUPPLEMENTARY DATA FIG S2A, Khalique et al.

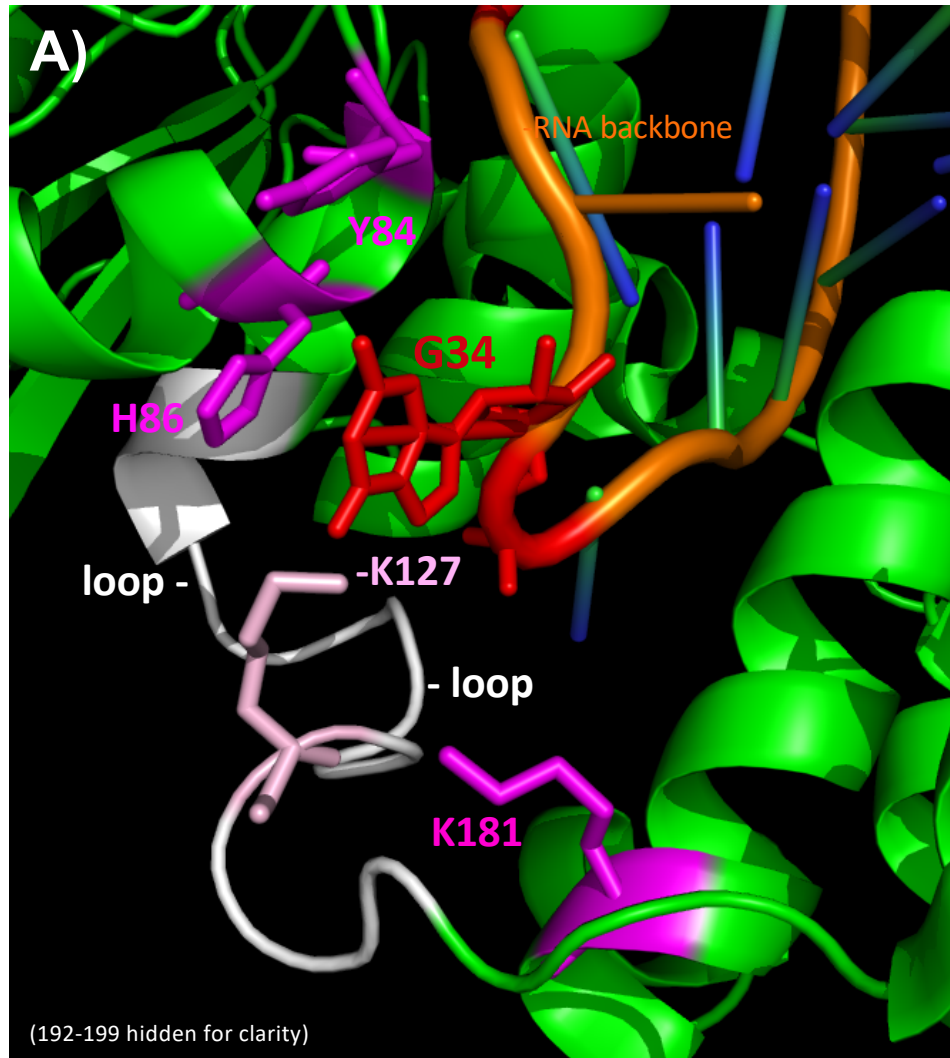

Source: https://www.biorxiv.org/content/10.1101/714972v1.full.pdf
